# Supplementary material for: Molecular Signatures of the Evolving Immune Response in Mice following a Bordetella pertussis Infection
Source: PLoS One. 2014 Aug 19;9(8):e104548. doi: 10.1371/journal.pone.0104548 (PMC4138111; doi:10.1371/journal.pone.0104548)
Supplement: Table S2 — Full list of genes expressed in the spleen. This file contains the full list of significantly expressed genes obtained by microarray analysis of the spleen, which can be used for additional in-depth information for each gene. In total 798 genes were significantly altered compared to naïve mice. The expression pattern for each gene is given including the fold changes at each time point. In addition to the official gene symbol (obtained from the Nimblegen array), the full gene name, synonyms and gene ID are given. Synonyms are not given for all genes but only for genes that were included in detail in the manuscript. Gene ID is a linked to gene information on the NCBI website. Subsequently, there are three columns with gene information obtained in databases; (i) BioGPS, (ii) Gene Ontology – Biological Processes (GO-BP), (iii) KEGG pathways. Pull-down menus can be used to search for specific information in the full gene list. For BioGPS, information about cell and tissue specific gene expression is given for the following databases; B-cells (B), dendritic cells (DC), lung (Lu), lymph node (LN), mast cells (MC), macrophages (MF), neutrophils (N), spleen (Sp) and T-cells (T). For GO-BP the following biological processes were included; ‘acute inflammatory response’, ‘antigen processing and presentation’, ‘cell activation’, ‘chemotaxis’, ‘chromatin assembly’, ‘defense response’, ‘hemopoiesis’, ‘immune response’, ‘inflammatory response’, ‘intracellular signaling cascade’, ‘regulation of apoptosis’, ‘response to bacterium’ and ‘transcription’. For KEGG the following pathways were included; ‘Antigen processing and presentation’, ‘Apoptosis’, ‘B cell receptor signaling pathway’, ‘Cell adhesion molecules (CAMs)’, ‘Chemokine signaling pathway’, ‘Complement and coagulation cascades’, ‘Cytokine-cytokine receptor interaction’, ‘Endocytosis’, ‘Leukocyte transendothelial migration’, ‘MAPK signaling pathway’, ‘NOD-like receptor signaling pathway’ and ‘Toll-like receptor signaling pathw [file pone.0104548.s009.xlsx]

## Sheet: Spleen expression data
						Expression pattern					Official	Synonym	Full Gene Name	PUBMED	BIOGPS	Gene Ontology - Biological Processes	KEGG
	Naïve	4h	d1	d2	d4	d7	d10	d14	d21	d28	Gene Symbol
	1	1.20182	1.24462	1.1624	1.01076	1.35576	1.14554	1.24943	1.57148	1.15278	0610040B10RIK		RIKEN cDNA 0610040B10 gene	67672
	1	0.970541	0.782721	0.887341	0.934443	1.02086	1.52488	1.18912	1.50416	0.992835	1110017F19RIK		RIKEN cDNA 1110017F19 gene	68528
	1	1.17919	1.06041	0.976473	0.974656	1.17281	1.60492	1.52966	1.98733	1.13996	1110020A21RIK		RIKEN cDNA 1110020A21 gene	68531
	1	0.830948	0.875006	0.945828	1.09691	0.943556	0.814345	0.856291	0.654777	1.02324	1110037F02RIK		RIKEN cDNA 1110037F02 gene	66185
	1	1.2289	1.18475	1.08534	1.09979	1.35937	1.10167	1.12965	1.57134	1.08859	1110046J04RIK		RIKEN cDNA 1110046J04 gene	68808
	1	1.20015	1.28118	0.980496	0.893023	1.26037	1.23378	1.43748	1.58971	1.27009	1110054M08RIK		RIKEN cDNA 1110054M08 gene	68841
	1	1.19595	1.1646	1.21606	1.16364	1.29375	1.44622	1.24855	1.59547	1.16987	1110058L19RIK		RIKEN cDNA 1110058L19 gene	68002
	1	1.1532	0.999428	0.721407	0.830264	1.16169	1.77767	1.70056	1.76191	0.957923	1190002F15RIK		RIKEN cDNA 1190002F15 gene	381822	T
	1	0.915859	0.939485	1.01115	1.11804	1.06162	0.935688	0.948211	0.52785	0.952935	1200014J11RIK		RIKEN cDNA 1200014J11 gene	66874
	1	0.999781	0.66863	1.14004	0.987687	0.95536	1.51599	1.26747	1.17433	1.10351	1700006J14RIK		RIKEN cDNA 1700006J14 gene	321010
	1	1.27696	1.29668	1.1844	1.10524	1.35429	1.41444	1.35087	1.66731	1.11293	1700011J10RIK		RIKEN cDNA 1700011J10 gene	67686
	1	1.19299	1.03909	1.18649	1.32761	1.5009	1.69746	1.15821	2.49108	1.16345	1700013D24RIK		RIKEN cDNA 1700013D24 gene	76921
	1	1.0908	0.924368	0.958375	1.09544	1.19769	1.45484	1.25272	1.69094	0.945749	1700013G23RIK		RIKEN cDNA 1700013G23 gene	69378
	1	1.20412	1.29288	1.00514	0.994426	1.24531	1.46866	1.646	1.33506	1.29007	1700020I14RIK		RIKEN cDNA 1700020I14 gene	66602
	1	1.05742	1.11308	1.08753	1.26739	0.891816	0.932775	0.934738	0.51455	0.954126	1700081L11RIK		RIKEN cDNA 1700081L11 gene	76719
	1	1.17845	1.12349	0.879754	0.780501	1.12793	1.51445	1.40823	1.29386	1.10857	1700125D06RIK		RIKEN cDNA 1700125D06 gene	68233
	1	1.15001	1.00573	1.20715	1.15331	1.29386	1.30326	1.16233	1.50263	1.06112	1810014B01RIK		RIKEN cDNA 1810014B01 gene	66263
	1	1.03093	1.05833	1.1631	1.13002	1.23661	1.2609	1.04747	1.68289	1.03366	1810022K09RIK		RIKEN cDNA 1810022K09 gene	69126
	1	1.08744	0.918563	1.10988	1.04777	1.1832	1.21391	1.15135	1.56344	1.11253	1810035L17RIK		RIKEN cDNA 1810035L17 gene	380773		transcription,
	1	1.13114	1.16084	1.08108	0.939391	1.20689	1.05593	1.1669	1.62866	1.07514	1810044D09RIK		RIKEN cDNA 1810044D09 gene	69798
	1	1.07028	0.833943	0.823379	0.821251	1.08204	1.447	1.43592	1.57156	0.970149	2010110K18RIK		RIKEN cDNA 2010110K18 gene	75701
	1	1.18616	1.09963	1.25898	1.1293	1.25638	1.17377	1.00848	1.53519	1.14517	2010204K13RIK		RIKEN cDNA 2010204K13 gene	68355
	1	1.17576	0.950147	1.11773	1.04252	1.1773	1.09167	1.20802	1.53339	0.943777	2010305A19RIK		RIKEN cDNA 2010305A19 gene	69893
	1	1.26893	1.53688	1.23022	0.846119	1.45348	0.751962	1.00784	1.57941	1.15541	2300009N04RIK		RIKEN cDNA 2300009N04 gene	69477
	1	1.12636	1.09755	0.771351	0.804175	1.03382	1.5125	1.50318	1.85999	1.16847	2500002B13RIK		RIKEN cDNA 2500002B13 gene	78353
	1	1.19876	0.864034	0.90749	0.878652	1.31836	2.00954	1.82438	2.11249	1.07277	2510003D18RIK		RIKEN cDNA 2510003D18 gene	72317
	1	0.969466	0.87217	0.933476	0.922069	0.880409	0.946718	0.848551	0.649413	0.97364	2510039O18RIK		RIKEN cDNA 2510039O18 gene	77034
	1	1.14186	1.00549	1.15101	1.13402	1.25323	1.47979	1.50735	1.818	0.996169	2610002M06RIK		RIKEN cDNA 2610002M06 gene; chromatin modifying protein 1B	67028			Endocytosis,
	1	1.26369	1.16287	1.17796	1.19552	1.47259	1.16718	1.1549	1.56531	1.04874	2610019E17RIK		RIKEN cDNA 2610019E17 gene	75614
	1	1.11582	0.966518	0.97976	1.04203	1.29782	1.6144	1.59153	2.01301	1.06072	2700081L22RIK		RIKEN cDNA 2700081L22 gene	72648
	1	1.16726	1.11672	0.901474	0.871725	0.986862	1.35174	1.38635	1.5294	1.05443	2810030D12RIK		RIKEN cDNA 2810030D12 gene	78335
	1	1.1561	1.14614	1.18081	1.0449	1.22931	0.976602	1.08551	1.5948	1.08853	2810403D21RIK		RIKEN cDNA 2810403D21 gene	69964
	1	1.07148	0.752793	0.970226	0.989634	1.13132	1.62956	1.43451	1.80328	1.07683	2810408I11RIK		RIKEN cDNA 2810408I11 gene	69941
	1	0.884257	0.68473	0.783574	0.813502	1.0046	1.49264	1.5065	1.32934	0.928688	2810417H13RIK		RIKEN cDNA 2810417H13 gene	68026
	1	1.15108	1.00011	1.13658	1.0367	1.15617	1.408	1.26962	1.65397	1.11467	2900053O20RIK		RIKEN cDNA 2900053O20 gene	72971
	1	0.860867	0.907564	1.01835	0.990641	0.877101	0.841232	0.757245	0.626971	0.948889	4631423B10RIK		RIKEN cDNA 4631423B10 gene	109292
	1	1.16713	0.821825	0.956025	0.979528	1.22969	1.65993	1.59939	1.67528	1.13096	4930422G04RIK		RIKEN cDNA 4930422G04 gene	71643
	1	1.04598	0.854336	0.928394	1.00466	1.11511	1.86122	1.60327	1.36625	1.05287	4930430F08RIK		RIKEN cDNA 4930430F08 gene	68281
	1	0.876029	1.00975	1.00868	0.96598	0.966935	0.963827	0.968306	0.634326	1.06387	4930445K14RIK		RIKEN cDNA 4930445K14 gene	74886
	1	1.21513	1.41348	1.31518	1.0928	1.42347	1.26987	1.25863	1.72849	1.19541	4930455G09RIK		RIKEN cDNA 4930455G09 gene	78917
	1	0.927668	1.15096	0.852035	1.27852	0.969407	0.703624	0.737643	0.63958	0.849082	4930523C07RIK		RIKEN cDNA 4930523C07 gene	67647
	1	1.13037	1.02883	1.10826	1.14072	1.22671	1.21004	1.17138	1.55914	1.09233	5530601H04RIK		RIKEN cDNA 5530601H04 gene	71445
	1	0.944228	1.01915	1.02018	1.01134	1.17351	1.1847	1.14594	1.85744	1.04185	5730437N04RIK		RIKEN cDNA 5730437N04 gene	70544
	1	1.15207	1.12484	1.16174	1.12478	1.33388	1.18128	1.14826	1.6489	1.06139	6330409N04RIK		RIKEN cDNA 6330409N04 gene	66674
	1	1.1722	1.17615	1.27451	1.21818	1.39918	1.05638	1.09115	1.71787	1.03072	6330578E17RIK		RIKEN cDNA 6330578E17 gene	76178
	1	0.973962	1.22404	0.932913	1.23879	0.932714	0.651254	0.741963	0.430747	1.07396	6430527G18RIK		RIKEN cDNA 6430527G18 gene	238330
	1	1.1207	1.14501	1.11126	0.990938	1.23869	1.13688	1.21454	1.50318	1.11156	6530401N04RIK		RIKEN cDNA 6530401N04 gene	328092
	1	1.4291	1.42296	0.943745	1.35799	1.16867	0.879824	1.1263	0.973883	1.53714	6720475J19RIK		RIKEN cDNA 6720475J19 gene	68157
	1	1.15951	1.14119	0.841069	0.841058	1.19644	1.2024	1.48139	1.53408	1.16248	8430403D17RIK		RIKEN cDNA 8430403D17 gene	71489
	1	1.14573	1.35655	1.25603	0.96112	1.43197	1.04735	1.12426	1.63977	1.12724	9330179D12RIK		RIKEN cDNA 9330179D12 gene	77558
	1	0.881519	0.609273	0.937546	0.961982	0.950633	1.30457	1.20878	1.31007	0.994036	9530077C05RIK		RIKEN cDNA 9530077C05 gene	68283
	1	1.20258	1.15107	0.967153	0.870144	1.15782	1.50143	1.41804	1.46436	1.07482	A930006K02RIK		RIKEN cDNA A930006K02 gene	78433
	1	0.994946	1.2768	0.875164	0.867445	0.929555	0.894282	1.07889	2.56464	1.38308	AA467197	LMIR2/CLM4/MAIR-II	expressed sequence AA467197	433470	N,MF
	1	0.981981	1.03339	0.934447	0.989956	0.895255	0.855699	0.866087	0.599618	0.891282	AAMP		angio-associated migratory protein	227290
	1	0.838272	0.878108	0.853706	0.91269	0.759868	0.713786	0.739686	0.612635	0.874427	ABCD1		ATP-binding cassette, sub-family D (ALD), member 1	11666
	1	0.99576	0.825788	0.847893	0.944705	0.733527	0.735373	0.80171	0.515793	0.752933	ABCF1		ATP-binding cassette, sub-family F (GCN20), member 1	224742
	1	1.14161	0.901856	0.783994	0.84499	1.11893	1.91364	1.95532	1.85235	0.919232	ABCG2		ATP-binding cassette, sub-family G (WHITE), member 2	26357
	1	0.842039	1.05362	1.02249	1.16125	0.945204	0.815527	0.7825	0.58263	0.977947	ABLIM1		actin-binding LIM protein 1	226251
	1	1.20155	1.24994	0.913786	0.881167	1.33412	1.32231	1.59769	1.70651	1.16527	ABPH		secretoglobin, family 1B, member 2	57426
	1	1.14997	0.90163	0.784089	0.806693	1.02903	1.59777	1.50837	1.36621	1.02859	ACP1		acid phosphatase 1, soluble	11431
	1	0.821743	1.04485	0.937813	0.957805	0.779414	0.717274	0.829065	0.479304	0.902863	ACTG1		actin, gamma, cytoplasmic 1	11465			Leukocyte transendothelial migration,
	1	1.12632	1.06593	1.17321	1.16718	1.3002	1.35044	1.11109	1.58642	1.12431	ACTL6B		actin-like 6B	83766		transcription,
	1	0.887176	0.96561	0.930137	0.990324	1.0499	0.903772	0.852253	0.644627	1.10209	ACTR5		ARP5 actin-related protein 5 homolog (yeast)	109275		transcription,
	1	1.09583	0.90896	0.852025	0.860851	1.1895	1.49594	1.37346	1.79438	1.03046	ACYP2		acylphosphatase 2, muscle type	75572
	1	0.90037	0.905847	0.849765	1.02219	0.804672	0.740448	0.77737	0.62263	0.901456	ADAM17		a disintegrin and metallopeptidase domain 17	11491		immune response,regulation of apoptosis,cell activation,hemopoiesis,cell activation,
	1	0.845818	1.088	0.859481	0.933018	0.841401	0.631416	0.745085	0.787476	0.829775	ADAMDEC1		ADAM-like, decysin 1	58860	Sp
	1	0.690919	0.923219	0.898147	0.972362	1.04446	0.824636	0.658877	1.0727	0.78178	ADAMTS1		a disintegrin-like and metallopeptidase (reprolysin type) with thrombospondin type 1 motif, 1	11504
	1	1.1992	0.98008	1.01971	0.960162	1.25071	1.08475	1.13084	1.51584	1.09876	ADAT2		adenosine deaminase, tRNA-specific 2, TAD2 homolog (S. cerevisiae)	66757
	1	0.83388	0.946925	0.883127	1.10625	0.874817	0.680336	0.712811	0.589814	0.836388	ADCY7		adenylate cyclase 7	11513		intracellular signaling cascade,	Chemokine signaling pathway,
	1	1.24227	1.25328	0.683834	0.591552	1.03132	1.11008	1.69928	1.27962	0.989418	ADIPOR1		adiponectin receptor 1	72674		intracellular signaling cascade,
	1	1.17299	1.10819	1.28387	1.01691	1.38264	1.07682	1.09264	1.96775	1.0225	ADK		adenosine kinase	11534
	1	1.10142	1.03372	1.04782	1.07885	1.31916	1.36081	1.31093	1.73046	1.29705	AGBL3		ATP/GTP binding protein-like 3	76223
	1	1.08101	1.08001	1.1373	1.00919	1.24115	1.13813	1.05991	1.68644	0.971427	AGTPBP1		ATP/GTP binding protein 1	67269
	1	1.04443	1.14209	1.02301	1.03547	0.991887	0.949172	0.963008	0.658979	0.98116	AKAP8L		A kinase (PRKA) anchor protein 8-like	54194
	1	1.60546	1.70609	1.36996	1.36178	1.53261	1.31691	1.22899	2.88646	1.68909	AKR1B7		aldo-keto reductase family 1, member B7	11997
	1	0.965435	0.47293	1.05159	0.892556	0.917691	1.33674	1.23198	1.50567	0.998304	ALDH1A7		aldehyde dehydrogenase family 1, subfamily A7	26358	Lu
	1	0.92906	0.955143	1.02697	0.921224	0.857205	0.750211	0.714356	0.616761	0.930618	AMPD2		adenosine monophosphate deaminase 2 (isoform L)	109674
	1	1.11559	1.03965	1.13423	1.06247	1.13893	1.16469	1.11576	1.50498	1.01444	ANGEL2		angel homolog 2 (Drosophila)	52477
	1	0.916577	1.04933	0.971184	0.94587	0.885074	0.836301	0.873589	0.603679	0.811488	ANKRD11		ankyrin repeat domain 11	77087
	1	1.14618	1.04573	0.967053	0.89871	1.21288	1.17874	1.38121	1.60709	1.01337	ANUBL1		AN1, ubiquitin-like, homolog (Xenopus laevis)	67492
	1	0.773132	1.00403	0.762406	0.917053	0.923929	0.590483	0.730013	1.04606	1.01866	ANXA1		annexin A1	16952
	1	1.0593	1.36334	0.959399	0.953623	0.754256	0.631752	0.68532	0.588984	0.84806	APOE		apolipoprotein E	11816		regulation of apoptosis,
	1	0.417574	0.487041	0.276165	0.294418	1.12351	1.81656	2.64698	1.31371	1.28287	APOL11B		apolipoprotein L 11b	328563
	1	1.08386	0.912077	0.746901	0.832402	0.968241	1.43123	1.53839	1.38104	0.94931	ARHGAP11A		Rho GTPase activating protein 11A	228482
	1	1.25262	1.14639	1.08175	1.08087	1.16148	1.44075	1.54352	1.16023	0.916836	ARHGAP23		RIKEN cDNA 4933428G20 gene	58996
	1	0.827476	1.01623	1.04444	1.01289	0.871843	0.762027	0.76105	0.610151	0.928391	ARHGAP30		Rho GTPase activating protein 30	226652
	1	0.834703	1.04788	1.01334	1.11899	0.925357	0.801961	0.743428	0.595543	0.870949	ARHGAP4		Rho GTPase activating protein 4	171207	B
	1	0.953679	1.09921	1.02423	1.04646	0.922824	0.799522	0.798857	0.46567	0.87596	ARHGEF1		Rho guanine nucleotide exchange factor (GEF) 1	16801		intracellular signaling cascade,
	1	0.845736	1.03372	0.91402	1.05802	1.01759	0.810069	0.746196	0.644106	0.957164	ARHGEF18		rho/rac guanine nucleotide exchange factor (GEF) 18	102098		intracellular signaling cascade,
	1	0.98027	0.962017	0.998884	1.0177	0.897478	0.78282	0.801286	0.622612	0.999527	ARHGEF2		rho/rac guanine nucleotide exchange factor (GEF) 2	16800		intracellular signaling cascade,
	1	0.958833	1.03408	1.04968	1.13015	0.921118	0.839092	0.82181	0.633862	0.924164	ARID5A		AT rich interactive domain 5A (MRF1-like)	214855		transcription,
	1	1.24051	1.17898	0.750636	0.886687	1.12241	1.58388	1.691	1.99721	0.891671	ARL4A		ADP-ribosylation factor-like 4A	11861		intracellular signaling cascade,
	1	0.929875	1.1734	1.0159	1.11293	0.922925	0.728557	0.760599	0.639765	0.924792	ARL4C		ADP-ribosylation factor-like 4C	320982		intracellular signaling cascade,
	1	0.78099	0.974444	0.968476	0.986529	0.800384	0.773928	0.780566	0.627739	0.946925	ARNTL		aryl hydrocarbon receptor nuclear translocator-like	11865		transcription,
	1	0.936093	1.02382	0.936828	0.873962	0.856542	0.745246	0.76656	0.610311	0.896519	ARPC1B		actin related protein 2/3 complex, subunit 1B	11867
	1	0.912111	1.01585	1.1037	1.00679	0.995109	0.983075	0.938009	0.598297	0.919464	ARPP19		cAMP-regulated phosphoprotein 19	59046
	1	1.0561	1.28206	0.973743	1.04839	0.885533	0.881299	0.992182	0.641858	0.933863	ASB2		ankyrin repeat and SOCS box-containing 2	65256	DC	intracellular signaling cascade,
	1	1.11726	0.780958	1.01441	0.991494	1.08186	1.55275	1.38608	1.4356	1.0403	ASF1A		ASF1 anti-silencing function 1 homolog A (S. cerevisiae)	66403		transcription,chromatin assembly,
	1	0.874833	0.894437	0.9477	1.06129	0.840387	0.781977	0.774802	0.664665	0.807076	ASH1L		ash1 (absent, small, or homeotic)-like (Drosophila)	192195		transcription,
	1	1.17545	1.17913	1.17963	1.06019	1.24199	1.06398	1.14131	1.50089	1.14777	ASPA		aspartoacylase	11484
	1	1.08415	1.12991	1.0845	0.968366	1.00313	1.02891	1.02355	0.589401	0.961124	ASPSCR1		alveolar soft part sarcoma chromosome region, candidate 1 (human)	68938
	1	0.963594	0.989118	0.871219	1.13223	0.964127	0.846785	0.790524	0.612986	0.940769	ATF7IP		activating transcription factor 7 interacting protein	54343		transcription,
	1	0.827912	0.964904	0.986236	0.987615	0.946043	0.841733	0.844477	0.634703	0.985748	ATIC		5-aminoimidazole-4-carboxamide ribonucleotide formyltransferase/IMP cyclohydrolase	108147
	1	1.11417	0.994787	1.08405	1.05893	1.15445	1.05992	1.13202	1.62687	1.02599	ATP11B		ATPase, class VI, type 11B	76295
	1	1.23619	1.26134	1.1201	1.07625	1.19168	0.856203	0.978933	0.636788	1.01971	ATP13A2		ATPase type 13A2	74772
	1	1.1182	1.0107	1.13504	1.11599	1.27308	1.51151	1.44477	1.79937	1.1455	ATP8A1		ATPase, aminophospholipid transporter (APLT), class I, type 8A, member 1	11980
	1	1.08132	0.882508	0.825191	0.786972	0.988357	1.63104	1.61671	1.32474	1.0129	ATPIF1		ATPase inhibitory factor 1	11983
	1	1.01737	1.01135	0.92477	1.21715	0.898706	0.831558	0.890531	0.662322	0.972121	ATRX		alpha thalassemia/mental retardation syndrome X-linked homolog (human)	22589
	1	1.18741	1.20418	1.16422	1.10787	1.09262	1.15921	1.11622	0.654172	0.910014	ATXN2L		ataxin 2-like	233871
	1	0.978904	1.10666	1.03872	1.01706	0.944171	0.94303	0.96075	0.56227	0.969725	ATXN7L3B		ataxin 7-like 3B	382423
	1	1.23891	1.19917	0.948278	0.920509	1.26158	1.2263	1.44208	1.7336	1.07531	AUH		AU RNA binding protein/enoyl-coenzyme A hydratase	11992
	1	1.07332	1.13539	1.13503	1.01484	1.1142	1.11227	1.1534	1.5929	1.12148	AW822252		expressed sequence AW822252	331578
	1	0.909022	0.961122	0.853647	0.949662	0.8581	0.825086	0.85958	0.625017	0.998055	AXIN1		axin 1	12005
	1	1.22804	1.1608	0.703849	0.740903	0.966944	1.24401	1.58244	0.965816	1.08682	B230312A22RIK		RIKEN cDNA B230312A22 gene	230088
	1	0.768965	1.00449	1.23423	1.08552	1.23606	1.04278	1.03524	0.623534	1.00252	BACH2		BTB and CNC homology 2	12014		transcription,
	1	1.10638	1.11673	1.03124	1.02195	0.955864	0.899482	0.99152	0.654525	0.848699	BAG6		BCL2-associated athanogene 6	224727
	1	0.838699	0.980588	1.02682	1.21886	0.998985	0.974077	0.939942	0.603434	0.913436	BANK1		B-cell scaffold protein with ankyrin repeats 1	242248	B,T,MC,LN,Sp	cell activation,cell activation,
	1	0.785596	0.917487	0.911257	1.06076	0.881663	0.787567	0.671708	0.657403	0.712593	BANP		BTG3 associated nuclear protein	53325		transcription,
	1	1.13147	1.20162	1.18256	1.14483	1.19939	1.27998	1.25051	1.56007	1.08636	BC025920		cDNA sequence BC025920	268319
	1	1.19794	1.11299	0.826497	0.862301	1.01598	1.87638	1.74097	1.17775	1.06013	BC026600		cDNA sequence BC026600	414070
	1	0.890494	0.830429	0.918136	0.999103	0.785582	0.795617	0.784485	0.598455	0.907193	BC068281		cDNA sequence BC068281	238037
	1	0.933008	0.983987	1.07843	0.924036	1.93054	0.994896	1.26706	2.30961	1.41532	BC117090		cDNA sequence BC1179090	100038854
	1	0.804183	0.920557	0.972627	1.09683	1.01486	0.800249	0.843621	0.649231	0.857724	BCL11A		B-cell CLL/lymphoma 11A (zinc finger protein)	14025	B,DC	transcription,cell activation,hemopoiesis,cell activation,
	1	1.10531	1.3896	1.10024	1.21775	0.896983	0.787477	0.758244	0.640683	0.940256	BCL11B		B-cell leukemia/lymphoma 11B	58208	T	transcription,regulation of apoptosis,cell activation,hemopoiesis,cell activation,
	1	1.33328	1.33206	0.73891	0.770104	1.03655	1.40086	1.81525	0.821831	1.05126	BCL2L1		BCL2-like 1	12048		regulation of apoptosis,	Apoptosis,
	1	1.20265	0.993231	1.08376	0.994924	1.33639	1.406	1.27675	1.78819	1.0673	BCL2L15		BCLl2-like 15	229672
	1	1.18329	0.657397	0.96379	0.891841	1.23176	1.67232	1.74202	1.43463	1.07728	BEX4		brain expressed gene 4	406217
	1	1.0226	1.03167	1.11768	1.14017	0.996584	0.990004	0.978203	0.538976	0.879112	BICD2		bicaudal D homolog 2 (Drosophila)	76895
	1	0.789374	0.912797	0.97027	0.985347	0.9362	0.940929	0.826285	0.593297	0.928283	BIRC6		baculoviral IAP repeat-containing 6	12211		regulation of apoptosis,
	1	0.931859	0.961821	0.974938	0.977643	0.838866	0.709361	0.718363	0.592605	0.827744	BMF		BCL2 modifying factor	171543		regulation of apoptosis,
	1	1.63442	1.06428	1.10983	1.23349	1.02324	1.01576	0.984703	1.0725	1.0301	BMPER		BMP-binding endothelial regulator	73230
	1	1.01461	0.966417	1.07729	1.0496	1.00159	1.00376	0.977531	0.651739	0.856267	BRD2		bromodomain containing 2	14312
	1	1.11563	0.997919	1.15642	1.19756	1.3088	1.13771	1.08927	1.5541	1.08438	C1D		C1D nuclear receptor co-repressor	57316		transcription,
	1	1.0682	1.33249	1.1506	0.968359	1.02005	0.905975	0.983343	0.549572	1.13614	C1QA		complement component 1, q subcomponent, alpha polypeptide	12259	MF	immune response,defense response,inflammatory response,acute inflammatory response,	Complement and coagulation cascades,
	1	1.12887	0.855637	0.826063	0.900913	1.19332	1.97751	1.78641	1.62403	1.02555	C330027C09RIK		RIKEN cDNA C330027C09 gene	224171
	1	1.13801	1.19918	0.924546	1.07222	0.90981	0.736287	0.821664	0.533798	0.945118	C4A		complement component 4A (Rodgers blood group)	625018		immune response,defense response,inflammatory response,acute inflammatory response,	Complement and coagulation cascades,
	1	1.26456	1.10369	0.790522	0.87164	1.16216	1.45549	1.6508	1.59524	1.08685	C530008M17RIK		RIKEN cDNA C530008M17 gene	320827
	1	1.11982	0.918052	1.0194	1.11469	1.18468	0.987226	0.8634	1.58288	1.01433	CALML4		calmodulin-like 4	75600
	1	0.950382	0.966387	0.948953	0.976697	0.903333	0.882379	0.911961	0.594369	1.0275	CALR		calreticulin	12317		antigen processing and presentation,	Antigen processing and presentation,
	1	0.950862	0.940511	1.00504	0.982624	1.097	1.03547	0.962983	0.657143	0.928336	CAMKK2		calcium/calmodulin-dependent protein kinase kinase 2, beta	207565
	1	1.15922	1.11374	1.17355	1.07019	1.22883	1.34482	1.34428	1.53345	1.0885	CAMTA1		calmodulin binding transcription activator 1	100072		transcription,
	1	0.934075	1.07356	0.968774	1.01996	0.907693	0.798932	0.873356	0.64009	0.999829	CANT1		calcium activated nucleotidase 1	76025
	1	0.938175	0.864779	0.851391	1.17095	0.844224	0.845635	0.90459	0.60353	1.0565	CANX		calnexin	12330			Antigen processing and presentation,
	1	0.937302	1.08949	0.979237	1.10634	0.889534	0.752999	0.822071	0.569935	0.92138	CAP1		CAP, adenylate cyclase-associated protein 1 (yeast)	12331
	1	1.15862	0.616726	1.17453	1.06886	1.25869	1.94823	1.99437	1.76251	1.30516	CAR1		carbonic anhydrase 1	12346
	1	1.06119	1.15518	1.21843	1.01315	1.07481	1.00922	0.974334	0.607513	0.957195	CBFA2T3		core-binding factor, runt domain, alpha subunit 2, translocated to, 3 (human)	12398		transcription,hemopoiesis,
	1	1.31639	1.23419	1.34988	1.19868	1.36402	1.4061	1.30901	1.86895	1.17002	CBR4		carbonyl reductase 4	234309
	1	1.00746	1.0008	1.06065	1.07143	1.10583	1.24174	1.18488	1.51808	1.04309	CBWD1		COBW domain containing 1	226043
	1	0.805184	0.748166	0.91313	1.05283	0.718205	0.807785	0.653269	0.726156	0.846926	CCDC117		coiled-coil domain containing 117	104479
	1	1.15244	0.887977	0.905161	0.985439	1.11581	1.85839	1.62246	1.78205	1.01156	CCDC34		coiled-coil domain containing 34	68201
	1	1.04103	0.718615	1.01235	0.956097	1.12568	1.7276	1.52113	1.36944	1.03577	CCDC74A		coiled-coil domain containing 74A	72315
	1	0.947145	1.26117	1.03618	0.936767	0.817336	0.713516	0.7315	0.620467	0.961217	CCL21A		chemokine (C-C motif) ligand 21A	18829	Lu,LN,Sp		Chemokine signaling pathway,Cytokine-cytokine receptor interaction,
	1	1.26755	1.82586	1.44661	1.15657	1.5529	1.16924	1.24024	1.78854	1.35149	CCL6		chemokine (C-C motif) ligand 6	20305	N,MF	immune response,chemotaxis,	Chemokine signaling pathway,Cytokine-cytokine receptor interaction,
	1	1.07313	0.614525	1.03198	1.06699	0.930997	1.25066	1.06865	0.951187	0.903648	CCNB1IP1		cyclin B1 interacting protein 1	239083
	1	0.922211	1.00202	1.04415	1.16707	0.968965	0.791616	0.718465	0.607332	0.750055	CCND2		cyclin D2	12444
	1	0.937326	0.983709	1.02519	1.19273	1.00298	0.96594	0.898921	0.647861	0.969917	CCNL1		cyclin L1	56706		transcription,
	1	0.882813	0.805356	0.825838	0.982645	0.763979	0.835909	0.828394	0.659741	0.897344	CCT3		chaperonin containing Tcp1, subunit 3 (gamma)	12462
	1	0.851671	1.01278	0.87021	0.928101	0.930782	0.707311	0.834312	0.560875	0.941358	CD22		CD22 antigen	12483	B,LN,Sp		B cell receptor signaling pathway,Cell adhesion molecules (CAMs),
	1	0.770727	0.996921	1.00545	0.969777	0.684695	0.683833	0.606387	0.685719	0.836728	CD247		CD247 antigen	12503	T
	1	1.10867	0.945757	0.816951	0.821499	1.12411	1.62133	1.67255	1.63979	1.02854	CD59A		CD59a antigen	12509			Complement and coagulation cascades,
	1	1.08742	0.945737	0.92966	0.971472	1.13015	1.65114	1.55025	1.64766	1.02523	CD59B		CD59b antigen	333883			Complement and coagulation cascades,
	1	0.746961	0.828655	0.814438	0.949207	0.794951	0.690877	0.68795	0.582241	0.837717	CD72		CD72 antigen	12517	B,MF,Sp		B cell receptor signaling pathway,
	1	1.11911	1.24989	1.15463	1.28872	1.0357	1.05539	1.15383	0.604786	0.921513	CD74		CD74 antigen (invariant polypeptide of major histocompatibility complex, class II antigen-associated)	16149	B,LN,Sp	intracellular signaling cascade,immune response,regulation of apoptosis,cell activation,defense response,hemopoiesis,cell activation,antigen processing and presentation,	Antigen processing and presentation,
	1	1.01702	1.06302	1.0977	0.974141	0.972724	0.830588	0.814195	0.641588	1.03124	CDC42EP1		CDC42 effector protein (Rho GTPase binding) 1	104445		intracellular signaling cascade,
	1	1.06417	1.16656	1.14057	1.01079	1.39779	0.95503	1.07379	1.70051	1.00829	CDK13		cell division cycle 2-like 5 (cholinesterase-related cell division controller)	69562
	1	1.13662	1.1089	0.771268	1.18543	0.828985	0.716447	0.827992	0.610575	1.02001	CDKN1B		cyclin-dependent kinase inhibitor 1B	12576		regulation of apoptosis,
	1	1.15513	1.1486	0.69823	0.703018	0.876313	1.49887	1.54496	0.935143	0.918368	CDKN2D		cyclin-dependent kinase inhibitor 2D (p19, inhibits CDK4)	12581
	1	1.1721	0.929779	0.725747	0.820229	1.09166	1.87383	1.85843	1.78005	0.949711	CDKN3		cyclin-dependent kinase inhibitor 3	72391
	1	0.907796	0.996138	1.0155	1.08272	1.07296	0.890086	0.848694	0.514238	1.00283	CDV3		carnitine deficiency-associated gene expressed in ventricle 3	321022
	1	0.965273	1.0668	1.03651	1.06815	0.98197	0.871755	0.909064	0.658704	0.960101	CDYL2		chromodomain protein, Y chromosome-like 2	75796
	1	1.3683	0.922625	0.656043	0.877651	0.976459	1.91063	2.05165	1.71454	0.845222	CENPF		centromere protein F	108000		regulation of apoptosis,
	1	1.18417	0.84686	0.937348	0.963264	1.1868	1.94091	1.62959	1.75662	1.1236	CENPK		centromere protein K	60411
	1	1.13194	0.917859	0.822643	0.88055	1.08972	1.62897	1.64711	1.32761	1.03748	CENPL		centromere protein L	70454
	1	1.03118	0.728078	0.844701	0.952467	1.16117	1.73121	1.51173	1.61729	1.02093	CENPP		centromere protein P	66336
	1	0.966479	0.999569	1.0051	1.08078	1.2538	1.5086	1.40033	1.40563	1.09833	CENPQ		centromere protein Q	83815
	1	1.02876	0.78561	0.936903	0.918225	1.15207	1.56241	1.52988	1.56345	1.03746	CENPW		centromere protein W	66311
	1	1.16172	0.973484	0.932609	0.967296	1.1758	1.5513	1.429	1.47892	1.09593	CEP70		centrosomal protein 70	68121
	1	1.00482	1.0165	1.14201	1.0817	1.23248	1.14372	1.12048	1.54107	1.10136	CEP97		centrosomal protein 97	74201
	1	1.49641	0.906797	1.37384	1.28229	1.46024	2.97441	2.72353	1.43055	0.990368	CES2G		carboxylesterase 2G	72361
	1	1.10445	0.92923	1.09836	1.08934	1.26915	1.33161	1.23165	1.53733	1.12993	CETN3		centrin 3	12626
	1	0.986395	0.799175	1.0212	0.96576	1.20579	1.49774	1.31481	1.59065	1.04168	CETN4		centrin 4; predicted gene 7094	207175
	1	1.04913	1.02694	0.630984	0.719864	0.895342	1.74958	1.56447	1.31662	0.965217	CHAC2		ChaC, cation transport regulator homolog 2 (E. coli)	68044
	1	1.05247	0.99841	1.05075	0.958028	1.07764	1.26688	1.18778	1.55412	0.98203	CHCHD2		coiled-coil-helix-coiled-coil-helix domain containing 2	14004
	1	1.05301	1.0311	0.935881	1.03263	0.86188	0.853548	0.902398	0.578688	0.906116	CHD4		chromodomain helicase DNA binding protein 4	107932		transcription,
	1	0.913259	0.551476	0.915022	1.01236	0.941871	1.44594	1.28215	1.21236	0.828759	CHEK1		checkpoint kinase 1 homolog (S. pombe)	12649	N	intracellular signaling cascade,
	1	1.11084	1.18576	0.938822	0.975658	1.25455	1.08858	1.1443	1.5081	1.14599	CHMP3		charged multivesicular body protein 3	66700
	1	1.03004	1.19285	1.00094	1.15857	1.03004	0.847449	0.809268	0.60978	0.915681	CHST15		carbohydrate (N-acetylgalactosamine 4-sulfate 6-O) sulfotransferase 15	77590
	1	1.00226	1.21796	1.07974	1.02061	1.12201	0.873678	0.996708	0.648859	1.05357	CIITA		class II transactivator	12265	B	transcription,immune response,defense response,inflammatory response,	Antigen processing and presentation,
	1	1.09062	0.822836	0.884044	0.847378	1.09439	1.5841	1.51045	1.34894	1.0192	CKS1B		CDC28 protein kinase 1b	54124
	1	1.12864	0.816799	0.944515	0.868956	1.17317	1.70387	1.62314	1.53452	1.06293	CKS2		CDC28 protein kinase regulatory subunit 2	66197
	1	0.868209	0.898786	0.928466	0.957423	0.863372	0.760529	0.798006	0.625405	0.891946	CLCN4-2		chloride channel 4-2	12727
	1	1.00367	1.24803	0.994122	1.01913	0.865983	0.757915	0.797728	0.643568	0.931369	CLDN5		claudin 5	12741	Lu		Cell adhesion molecules (CAMs),Leukocyte transendothelial migration,
	1	0.957749	1.00342	1.08295	1.09497	1.77297	1.27584	1.30395	1.87888	1.16702	CLEC4E		C-type lectin domain family 4, member e	56619	N,MF	immune response,
	1	1.22901	0.765669	1.02895	0.917387	1.2509	2.01563	2.07333	1.66783	1.00388	CLSPN		claspin homolog (Xenopus laevis)	269582
	1	0.830772	0.845979	0.89563	0.961599	0.93182	0.809996	0.888725	0.633661	0.962674	CMTM7		CKLF-like MARVEL transmembrane domain containing 7	102545		chemotaxis,
	1	1.25147	0.99492	0.825994	0.894828	1.04712	1.52096	1.54554	1.41124	1.10303	CNNM2		cyclin M2	94219
	1	0.930891	1.01735	1.01052	1.05356	0.90332	0.788271	0.799545	0.66347	0.917702	CNP		2',3'-cyclic nucleotide 3' phosphodiesterase	12799
	1	0.919353	0.903004	0.91934	0.965042	0.834251	0.807284	0.786771	0.665756	0.906092	COBRA1		cofactor of BRCA1	58202		transcription,
	1	1.17555	0.921251	1.20621	1.03662	1.28875	1.37032	1.31694	1.65455	1.11254	COQ7		demethyl-Q 7	12850
	1	0.819053	1.03215	1.03835	1.01045	0.807016	0.726989	0.732771	0.513161	0.843362	CORO1A		coronin, actin binding protein 1A	12721		chemotaxis,
	1	1.07019	0.636884	1.03595	0.91556	1.13548	1.53071	1.3907	1.56406	0.964767	COX6B2		cytochrome c oxidase subunit VIb polypeptide 2	333182
	1	1.15042	0.927078	1.12145	0.980508	1.19157	1.3941	1.23512	1.65389	1.11746	COX7A2		cytochrome c oxidase, subunit VIIa 2	12866
	1	1.09166	1.09845	1.32558	1.28721	1.33804	1.45731	1.29827	1.71574	1.3217	CRISP3		cysteine-rich secretory protein 3	11572	B
	1	0.808831	0.844016	0.85888	0.851291	0.789147	0.811267	0.708671	0.638513	0.931518	CRK		v-crk sarcoma virus CT10 oncogene homolog (avian)	12928			Chemokine signaling pathway,MAPK signaling pathway,
	1	0.957164	1.08747	1.0884	1.04485	1.01732	0.794188	0.836718	0.64631	0.909011	CRTC3		CREB regulated transcription coactivator 3	70461		transcription,
	1	1.04068	0.944651	1.0057	1.0109	0.901947	0.938386	0.961579	0.648521	1.06809	CRY2		cryptochrome 2 (photolyase-like)	12953		transcription,
	1	0.968811	1.0002	0.980756	0.986286	0.887683	0.874345	0.885325	0.638719	1.00903	CSDE1		cold shock domain containing E1, RNA binding	229663
	1	1.13306	1.40076	0.993628	1.2097	0.968728	0.730692	0.903492	0.644471	0.911191	CSF1R		colony stimulating factor 1 receptor	12978			Endocytosis,Cytokine-cytokine receptor interaction,
	1	0.931828	1.0481	0.936949	1.04287	0.859676	0.726724	0.802411	0.535917	0.818455	CSK		c-src tyrosine kinase	12988		intracellular signaling cascade,	Chemokine signaling pathway,
	1	1.07048	1.0618	1.07933	0.973734	0.979723	0.954555	0.932741	0.650582	0.959399	CSNK1G2		casein kinase 1, gamma 2	103236
	1	1.30486	1.39839	1.25772	1.13019	1.32647	1.22711	1.06819	1.71693	1.08308	CTLA2A		cytotoxic T lymphocyte-associated protein 2 alpha	13024	MC
	1	0.965319	0.943379	1.03377	0.910264	0.977993	0.896363	0.820334	0.539915	0.952935	CUX1		cut-like homeobox 1	13047		transcription,
	1	0.830243	1.06035	1.07466	1.06611	0.884216	0.731867	0.762184	0.624169	0.911289	CX3CR1		chemokine (C-X3-C) receptor 1	13051		immune response,regulation of apoptosis,cell activation,cell activation,chemotaxis,	Chemokine signaling pathway,Cytokine-cytokine receptor interaction,
	1	0.716158	1.20328	0.71004	0.695383	1.14503	0.844162	0.665137	0.9516	1.05811	CYR61		cysteine rich protein 61	16007		chemotaxis,
	1	0.92651	1.08998	0.972992	1.03217	0.931638	0.774278	0.816433	0.659009	0.979079	CYTH4		cytohesin 4	72318
	1	1.10665	0.889114	1.01522	1.04832	1.17645	1.53474	1.33198	1.38944	0.983621	D030056L22RIK		RIKEN cDNA D030056L22 gene	225995
	1	0.911193	0.994709	1.09937	1.06761	0.923396	0.940038	0.843816	0.57123	0.946658	D10BWG1070E		DNA segment, Chr 10, Brigham & Women's Genetics 1070 expressed	52902
	1	1.13138	1.07014	1.08494	1.03241	1.15291	1.06738	1.1228	1.51474	1.03703	D330028D13RIK		RIKEN cDNA D330028D13 gene	231946
	1	0.980743	0.782958	1.1632	1.02946	0.759339	1.57956	0.751698	0.693805	0.917189	D4WSU53E		DNA segment, Chr 4, Wayne State University 53, expressed	27981
	1	0.985141	1.07059	0.8159	1.00009	0.920459	0.819682	0.961155	0.61854	0.955391	D930015E06RIK		RIKEN cDNA D930015E06 gene	229473
	1	1.04568	1.05599	1.05	0.951396	0.972728	0.902391	0.925415	0.633376	0.939515	DAPK3		death-associated protein kinase 3	13144		intracellular signaling cascade,regulation of apoptosis,
	1	1.00028	1.06802	1.00317	0.983915	0.882544	0.872212	0.868074	0.625553	0.874778	DBNL		drebrin-like	13169		intracellular signaling cascade,immune response,
	1	1.2664	0.79783	0.84425	0.717166	0.879428	0.631797	0.648452	0.89813	0.736045	DBP		D site albumin promoter binding protein	13170		transcription,
	1	0.770491	0.746846	0.774284	0.742611	0.74802	0.739343	0.765841	0.490765	0.903169	DCP1A		DCP1 decapping enzyme homolog A (S. cerevisiae)	75901
	1	0.884095	0.981376	0.833008	1.02748	0.830441	0.787667	0.764932	0.621491	0.838797	DDX17		DEAD (Asp-Glu-Ala-Asp) box polypeptide 17	67040
	1	0.8448	1.03912	1.05504	1.20869	0.910403	0.914049	0.703989	0.456936	0.995187	DDX5		DEAD (Asp-Glu-Ala-Asp) box polypeptide 5; predicted gene 12183	13207
	1	1.28126	1.33216	1.01698	0.852245	1.27007	1.31152	1.61595	1.48802	1.12655	DEFB9		defensin beta 9	246079		defense response,response to bacterium,
	1	1.1805	0.998559	0.767448	0.799963	1.14926	2.12628	2.16253	1.74804	0.996066	DEPDC1A		DEP domain containing 1a	76131	T	intracellular signaling cascade,
	1	1.13674	0.860733	0.604364	0.680089	0.842391	1.58778	1.63856	1.48085	1.01153	DEPDC1B		DEP domain containing 1B	218581	T,N	intracellular signaling cascade,
	1	0.944421	1.13714	1.09337	1.0012	0.96313	0.944161	0.965098	0.647625	0.938416	DES		desmin	13346
	1	1.05603	1.22159	1.07904	1.14975	1.01977	0.860536	0.919205	0.633581	0.970154	DGKZ		diacylglycerol kinase zeta	104418		intracellular signaling cascade,
	1	0.922871	0.924702	0.898279	1.00069	0.798942	0.709271	0.771266	0.662692	0.837866	DHX30		DEAH (Asp-Glu-Ala-His) box polypeptide 30	72831
	1	1.04107	1.07592	1.02453	1.18491	0.983678	0.835561	0.880086	0.618945	1.00682	DIAP1		diaphanous homolog 1 (Drosophila)	13367
	1	1.11958	0.994926	0.92046	1.0718	1.3155	1.65776	1.64884	1.14061	1.01896	DLEU2		predicted gene 9069	668253
	1	1.01764	1.1158	1.08254	1.03752	1.22861	0.957916	0.929884	1.5191	1.07571	DMXL2		Dmx-like 2	235380
	1	1.06961	0.6647	0.89284	0.974162	1.03165	1.29765	1.33087	1.27824	0.924545	DNA2		DNA replication helicase 2 homolog (yeast)	327762
	1	0.692616	0.751887	0.925585	1.1627	0.731608	0.903129	0.658699	0.73639	0.751522	DNAJA1		DnaJ (Hsp40) homolog, subfamily A, member 1	15502		intracellular signaling cascade,
	1	1.17096	1.14555	1.01904	1.058	1.24487	1.17381	1.25155	1.54164	1.12259	DNAJB12		DnaJ (Hsp40) homolog, subfamily B, member 12	56709
	1	0.938231	1.07755	0.88375	1.39842	0.875752	0.676429	0.830768	0.578513	1.04491	DOCK10		dedicator of cytokinesis 10	210293
	1	0.93745	1.16077	1.075	1.09304	0.983991	0.840206	0.805453	0.635185	1.00876	DOK2		docking protein 2	13449	MF	intracellular signaling cascade,
	1	1.01619	0.996018	0.906894	0.995328	0.815932	0.823826	0.805338	0.630462	0.774571	DPP3		dipeptidylpeptidase 3	75221
	1	1.00619	0.852208	0.835047	0.78659	0.761908	0.682707	0.620314	0.875365	0.845251	DPT		dermatopontin	56429	Lu
	1	1.02229	0.599288	0.969573	1.06285	1.2582	1.672	1.67806	1.66298	1.08642	DSCC1		defective in sister chromatid cohesion 1 homolog (S. cerevisiae)	72107
	1	0.878403	1.00946	1.07071	0.9923	0.845846	0.811415	0.717795	0.509697	0.884166	DUSP2		dual specificity phosphatase 2	13537	B,MF		MAPK signaling pathway,
	1	1.09631	0.681242	1.06927	1.09441	1.21557	1.57804	1.49728	1.28191	1.05333	DUT		deoxyuridine triphosphatase	110074
	1	1.22119	1.28216	1.17332	1.24198	1.22832	1.11919	1.09185	1.51359	1.22548	E230029C05RIK		RIKEN cDNA E230029C05 gene	319711
	1	1.07211	0.776889	0.696187	0.768602	0.990068	1.68557	1.74718	1.49005	0.962264	ECT2		ect2 oncogene	13605		intracellular signaling cascade,
	1	1.37725	1.50011	1.03717	1.13438	1.27955	0.85591	1.06575	0.919603	1.16168	EDN1		endothelin 1	13614	MF	intracellular signaling cascade,
	1	1.04831	1.00472	0.978575	1.00694	0.967143	0.882157	0.821561	0.646691	0.911312	EGLN2		EGL nine homolog 2 (C. elegans)	112406
	1	0.948371	0.819188	0.901206	1.02044	1.02922	1.10626	1.11685	0.545497	0.923046	EIF4A1		eukaryotic translation initiation factor 4A1	13681
	1	0.8934	1.02031	0.92727	1.05277	0.990853	0.72928	0.822401	0.614031	0.967762	EIF4E2		eukaryotic translation initiation factor 4E member 2	26987
	1	1.0024	0.888843	0.836085	1.06347	0.853173	0.87274	0.984137	0.597444	0.92289	EIF4G1		eukaryotic translation initiation factor 4, gamma 1	208643
	1	1.1011	0.84626	0.914091	0.932539	1.27741	1.50386	1.63633	1.43775	1.01932	EMILIN2		elastin microfibril interfacer 2	246707
	1	1.18151	0.907247	1.15395	1.06922	1.26489	1.32573	1.35374	1.76324	1.08458	ENY2		enhancer of yellow 2 homolog (Drosophila)	223527		transcription,
	1	0.694623	1.04787	1.1779	1.06701	0.923913	0.836357	0.865379	0.58688	1.04899	EOMES		eomesodermin homolog (Xenopus laevis)	13813	T,DC	transcription,immune response,cell activation,hemopoiesis,cell activation,
	1	1.07643	1.02755	0.715073	0.660475	0.968216	1.29087	1.37042	1.10085	1.0345	EPB4.1		erythrocyte protein band 4.1	269587
	1	1.24152	0.85098	0.580661	0.71329	0.911223	1.31586	1.51946	1.52408	1.12692	EPB4.2		erythrocyte protein band 4.2	13828		hemopoiesis,
	1	1.19504	1.20272	1.18722	1.25947	1.15731	1.05323	1.04547	1.53938	1.00104	ERBB2IP		Erbb2 interacting protein	59079			NOD-like receptor signaling pathway,
	1	1.06682	1.18351	1.1697	1.14802	1.00318	0.875238	0.837652	0.525109	0.960131	ETS1		E26 avian leukemia oncogene 1, 5' domain	23871	T	transcription,
	1	0.808985	1.03186	0.916367	0.934662	0.91946	0.783604	0.792554	0.524076	1.04331	ETV3		ets variant gene 3	27049		transcription,
	1	0.840084	1.00175	0.890359	0.90954	0.912525	0.75199	0.809456	0.514769	1.02812	F420015M19RIK		RIKEN cDNA F420015M19 gene	619329
	1	1.05443	1.08261	1.13725	1.03956	1.17574	1.17954	1.18147	1.57188	1.14686	FAM151B		family with sequence similarity 151, member B	73942
	1	0.999866	1.00232	1.04246	1.09486	0.907839	0.83217	0.893285	0.658062	0.965512	FAM160B1		family with sequence similarity 160, member B1	226252
	1	0.967699	1.02365	0.97946	1.00347	0.887648	0.856096	0.820755	0.664451	0.975156	FAM168A		family with sequence similarity 168, member A	319604
	1	0.946498	0.892174	0.900516	1.04915	0.731005	0.699783	0.701284	0.562731	0.79172	FAM168B		family with sequence similarity 168, member B	214469
	1	0.900628	1.02017	0.93853	0.907342	0.926703	0.858187	0.829657	0.637376	0.95222	FAM193B		cDNA sequence BC021381	212483
	1	1.13799	0.874837	0.908527	0.939005	1.01306	1.70008	1.47541	1.48384	1.08522	FAM33A	SKA2	spindle and kinetochore associated complex subunit 2	66140
	1	0.889303	0.950311	0.997199	0.931277	0.955141	0.840999	0.770993	0.585728	0.858395	FAM43A		family with sequence similarity 43, member A	224093
	1	0.918587	0.992902	0.985775	0.994282	0.933726	0.824521	0.779871	0.642847	0.916442	FAM46A		family with sequence similarity 46, member A	212943
	1	1.1361	0.771056	0.943637	0.962853	1.03055	1.56432	1.50313	1.37395	0.898498	FAM54A		family with sequence similarity 54, member A	71804
	1	0.880885	1.10764	1.05982	1.02013	1.01319	0.8555	0.790662	0.512174	0.989416	FAM65B		family with sequence similarity 65, member B	193385
	1	1.05738	0.930545	1.03018	1.01792	0.914422	0.795218	0.864772	0.593371	0.889289	FASN		fatty acid synthase	14104
	1	0.892794	1.07687	1.03228	1.07279	0.987587	0.875127	0.863937	0.625301	0.923444	FBXL12		F-box and leucine-rich repeat protein 12	30843
	1	0.887954	1.03426	1.17051	1.04708	0.921964	0.876333	0.873342	0.635265	0.881004	FBXO11		F-box protein 11	225055
	1	1.08641	0.914713	0.899051	0.85884	1.05435	1.30161	1.42224	1.55943	0.969171	FBXO9		f-box protein 9	71538
	1	1.22223	1.26197	0.829621	0.822763	1.13085	1.18484	1.55539	1.40651	1.13125	FBXW21		RIKEN cDNA E330009P21 gene	320082
	1	1.12506	1.40222	1.41977	1.36589	1.18791	1.15329	1.16986	1.65395	1.17712	FCER1A		Fc receptor, IgE, high affinity I, alpha polypeptide	14125	B,MC	intracellular signaling cascade,
	1	0.848658	0.891595	0.801386	1.05794	0.775175	0.694906	0.793902	0.626856	0.893301	FCGR2B	CD32	Fc receptor, IgG, low affinity IIb	14130		immune response,cell activation,defense response,cell activation,antigen processing and presentation,	B cell receptor signaling pathway,
	1	1.26537	1.37753	0.836752	0.761455	1.22513	1.11962	1.4857	1.55184	1.14159	FCGR3	CD16	Fc receptor, IgG, low affinity III	14131	MF	immune response,regulation of apoptosis,cell activation,defense response,cell activation,inflammatory response,chemotaxis,antigen processing and presentation,acute inflammatory response,
	1	1.14444	1.23	1.12356	1.17156	1.40067	1.29417	1.3088	1.60759	0.986107	FCGR4	CD16-2	Fc receptor, IgG, low affinity IV	246256	N,DC,MF
	1	0.93327	1.02275	1.02622	0.949087	0.942335	0.786545	0.79315	0.596992	0.761318	FGD2		FYVE, RhoGEF and PH domain containing 2	26382	B,DC
	1	0.945922	1.06711	0.98835	0.949361	0.896325	0.822957	0.875827	0.662912	0.885577	FLII		flightless I homolog (Drosophila); similar to cytoskeletal actin-modulating protein	14248		transcription,
	1	0.966345	1.05833	0.994453	0.950433	0.849994	0.738222	0.756326	0.602336	0.737354	FLNA		filamin, alpha	192176		intracellular signaling cascade,	MAPK signaling pathway,
	1	0.878528	1.05025	0.982784	1.04508	0.882257	0.817517	0.867154	0.646482	0.887526	FNBP1		formin binding protein 1	14269
	1	0.880578	1.09672	1.01004	1.00878	0.885069	0.847642	0.862251	0.595279	0.813582	FOXO1		forkhead box O1	56458		transcription,regulation of apoptosis,
	1	0.939151	0.906837	0.971857	1.02482	0.886784	0.820458	0.800569	0.609272	0.8922	FUK		fucokinase	234730
	1	1.14814	1.02815	1.07316	1.01447	1.20253	1.42846	1.39657	1.52396	1.08833	FUNDC2		FUN14 domain containing 2	67391
	1	0.821777	1.00272	0.641364	0.93377	0.822821	0.543832	0.642553	0.511307	0.939424	FUS		fusion, derived from t(12;16) malignant liposarcoma (human)	233908
	1	1.25924	1.08074	0.736343	0.760561	0.979849	1.30864	1.54416	0.900628	0.940726	FZR1		fizzy/cell division cycle 20 related 1 (Drosophila)	56371
	1	0.830623	0.922981	0.975089	0.996395	0.823051	0.865437	0.871809	0.626794	0.930518	G3BP1		Ras-GTPase-activating protein SH3-domain binding protein 1	27041
	1	1.20474	0.983823	1.05845	0.932491	1.14841	1.51682	1.36751	1.66896	1.09	G430095P16RIK		RIKEN cDNA G430095P16 gene	619292
	1	1.28134	1.36017	0.877801	0.899668	1.22273	1.25934	1.5584	1.59601	1.17296	GABARAPL2		gamma-aminobutyric acid (GABA) A receptor-associated protein-like 2	93739
	1	1.08576	1.01829	1.17591	1.11521	1.17857	1.17079	1.13704	1.60382	1.07707	GAS5		growth arrest specific 5	14455
	1	1.08156	0.949489	0.553634	0.635816	0.913336	1.66948	1.76683	1.2267	1.04408	GCH1		GTP cyclohydrolase 1	14528	MC	regulation of apoptosis,
	1	1.37049	1.34817	0.63996	0.716612	1.25048	1.18878	1.83126	1.46381	1.21105	GDA		guanine deaminase	14544
	1	1.28601	1.29001	1.02328	1.03439	1.23792	1.30074	1.47571	1.55444	1.15287	GDNF		glial cell line derived neurotrophic factor	14573		regulation of apoptosis,
	1	0.686901	0.607407	0.943865	0.662844	0.700345	0.727765	0.586576	0.911002	0.57758	GGH		gamma-glutamyl hydrolase	14590
	1	0.847729	1.07361	1.03893	0.94933	0.972262	0.884696	0.819253	0.574564	1.0281	GGPS1		geranylgeranyl diphosphate synthase 1	14593
	1	1.06481	0.988085	0.892821	1.02773	0.904994	0.954611	1.02576	0.6527	0.843888	GIGYF2		GRB10 interacting GYF protein 2	227331
	1	0.875269	1.1664	0.99821	1.24927	0.965703	0.631082	0.79455	0.929403	0.861036	GIMAP4		GTPase, IMAP family member 4	107526	B,T,DC,LN,Sp
	1	1.04273	1.42489	1.0535	0.823961	1.38393	0.85162	1.194	1.56051	1.05325	GIMAP5		GTPase, IMAP family member 5	317757	B,T
	1	1.02792	0.664788	0.910866	0.938954	1.08965	1.63197	1.50015	1.36679	0.942749	GINS1		GINS complex subunit 1 (Psf1 homolog)	69270	N
	1	1.05493	1.10554	0.889207	0.926562	1.15947	1.07344	1.36328	1.58563	1.12488	GJC1		gap junction protein, gamma 1	14615
	1	1.00061	1.12104	1.1792	1.16766	1.09934	0.841535	0.905613	0.628487	0.861267	GLB1		galactosidase, beta 1	12091
	1	1.17797	1.00296	1.11179	1.01544	1.24069	1.37633	1.22526	1.5945	1.04378	GM10012		predicted gene 10012	100043160
	1	0.847433	0.981455	1.14971	1.25771	1.10851	0.904457	0.895118	0.650303	0.899376	GM10060		predicted gene 10060; NSFL1 (p97) cofactor (p47) pseudogene	100041567
	1	1.22971	1.30908	0.934509	0.824756	1.14734	1.45216	1.70563	1.58419	1.21272	GM10177		predicted gene 10177	20335
	1	0.986136	1.16874	1.13537	1.09567	1.92883	1.24966	1.25842	1.90167	1.38299	GM11428		predicted gene 11428	100034251	MF
	1	1.07411	0.646095	1.07436	1.11809	1.29136	1.89096	1.6071	1.82112	1.1295	GM11837		predicted gene 11837	100038514
	1	1.22586	1.16123	0.678762	0.871211	1.10009	1.32985	1.53744	1.58433	0.978765	GM12839		predicted gene 12839; cytochrome P450, family 4, subfamily b, polypeptide 1	631037
	1	1.1987	1.20581	0.989095	0.940677	1.27114	1.21707	1.56861	1.46055	1.15221	GM13084		predicted gene 13084	381569
	1	1.05674	1.01931	1.08983	1.04375	1.17955	1.29609	1.19493	1.51329	1.00431	GM13202		predicted gene 13202	433806
	1	0.789887	0.955443	0.89289	1.09808	0.796036	0.650106	0.719776	0.635537	0.893166	GM14085		predicted gene 14085; solute carrier family 28 (sodium-coupled nucleoside transporter) member 2 (Slc28a2)	381417
	1	1.25022	0.889132	1.18198	1.19149	1.27673	1.5536	1.45758	1.74209	1.13509	GM14277		predicted gene 14277; small nuclear ribonucleoprotein D1	20641
	1	1.09519	0.950708	0.924104	0.992058	1.06778	1.55539	1.44288	1.48787	1.01496	GM14475		predicted gene 14475	100042946		chromatin assembly,
	1	1.05374	0.909939	0.908698	1.01835	1.10878	1.6236	1.61239	1.64698	0.919536	GM14484		predicted gene 14484	547160		chromatin assembly,
	1	1.13707	1.15735	1.03684	0.924722	0.993298	0.867559	1.07556	1.66159	1.0952	GM15056		predicted gene 15056; beta-defensin 52	100504014
	1	1.13461	1.13632	0.863671	0.816992	1.17886	1.2819	1.71212	1.64264	1.05434	GM15800		predicted gene 15800	269700
	1	1.03524	0.785991	1.12247	1.09662	1.27385	1.35841	1.17954	1.61151	1.02685	GM16373		predicted gene 16373; enhancer of yellow 2 homolog (Drosophila)	223527
	1	1.20492	0.995841	1.24695	1.0647	1.19602	1.61064	1.45223	1.51669	0.999048	GM16380		SIVA1, apoptosis-inducing factor pseudogene	100038996		regulation of apoptosis,
	1	1.07541	1.11937	0.839483	0.789887	1.08071	1.37928	1.52489	1.72596	1.24763	GM16412		SEC61, gamma subunit	20335
	1	0.924858	1.29322	0.997461	0.95947	0.842063	0.665226	0.692851	0.605285	0.985502	GM1987		predicted gene 1987; chemokine (C-C motif) ligand 21A	18829		immune response,defense response,inflammatory response,chemotaxis,	Chemokine signaling pathway,Cytokine-cytokine receptor interaction,
	1	0.773588	0.967553	0.81897	0.731152	0.853801	0.926396	1.07775	0.558465	0.840886	GM2258		predicted gene 2258	100039477
	1	1.37408	1.14775	1.00961	1.15152	1.31957	1.65848	1.47401	1.7324	1.25419	GM2810		predicted gene 2810	100040502		transcription,
	1	1.16178	1.24155	1.27367	1.02543	1.24634	1.27209	1.18219	1.67259	1.11935	GM3246		predicted gene 3246	100041277
	1	1.15426	0.802028	1.14534	0.927469	1.3544	1.34905	1.44013	1.84472	1.02454	GM3417		predicted gene 3417; t-complex-associated testis expressed 3	21647
	1	1.21967	1.30802	0.893554	0.795214	1.21921	1.24724	1.57463	1.49863	1.21352	GM3721		predicted gene 3721	100042205
	1	0.818884	0.917487	0.991694	1.15914	0.863353	0.805189	0.807215	0.585919	0.831949	GM3813		predicted gene 3813	100042383
	1	0.716956	0.968383	0.832343	0.819639	0.867703	0.878864	1.01889	0.577708	0.962664	GM4079		predicted gene 4079	100042867
	1	0.95127	0.939773	0.850164	0.970909	0.895343	0.924823	0.901186	0.608623	0.888309	GM4130		predicted gene 4130	100042959
	1	1.20737	1.24872	0.941856	0.813268	1.09853	1.4272	1.62464	1.57288	1.25417	GM4184		predicted gene 4184; SEC61, gamma subunit; similar to Sec61-complex gamma-subunit	20335
	1	0.756275	0.983689	0.771244	0.689283	0.868311	0.876076	1.03951	0.519991	1.01946	GM4326		predicted gene 4326	100043267
	1	0.688633	0.954249	0.796476	0.739091	0.861627	0.940313	1.08381	0.502922	0.993973	GM4408		predicted gene 4408	100043390
	1	1.08968	1.07003	1.31603	1.32935	1.25948	1.29075	1.12102	1.54372	1.25495	GM4540		predicted gene 4540; RIKEN cDNA 1810022K09 gene	69126
	1	0.924117	1.03483	0.859467	0.942886	0.842136	0.868732	0.920736	0.551191	0.971007	GM4720		predicted gene 4720	100043907
	1	0.949644	0.898319	1.0964	1.01282	1.00749	1.044	0.906357	1.50743	1.00331	GM5330		predicted gene 5330	384596
	1	1.02168	0.939958	1.14559	1.02586	1.33401	1.04714	1.09609	1.54784	1.25332	GM5416		predicted gene 5416	408196
	1	1.17436	1.23501	1.29271	1.09389	1.45621	1.15927	1.15676	1.72345	1.11368	GM568		predicted gene 568	230143
	1	1.22339	0.680731	1.24739	1.16258	1.32033	2.07339	2.16524	1.82054	1.26537	GM5843		predicted gene 5843	545507
	1	1.15459	0.898722	1.05294	1.09221	1.24853	1.54531	1.4278	1.65348	1.06474	GM6195		predicted gene 6195; replication protein A3	620986
	1	1.14597	0.856051	0.918229	0.844081	1.11278	1.5416	1.54113	1.44411	1.0814	GM6340		predicted gene 6340	622657
	1	1.07603	1.04888	1.21486	1.14739	1.30018	1.29493	1.17771	1.50725	1.00271	GM6505		predicted gene 6505	624446
	1	0.893694	1.01021	0.853191	0.890424	0.936757	0.887243	0.883754	0.592488	1.0882	GM6932		predicted gene 6932	628904
	1	1.17593	1.16082	1.31008	1.27189	1.47588	1.14988	1.20219	1.63507	1.03842	GM7665		predicted gene 7665; S100 calcium binding protein A11 (calgizzarin)	665509
	1	0.669125	0.722353	0.863415	1.08713	0.727603	0.852522	0.624304	0.718415	0.803879	GM7816		predicted gene 7816; DnaJ (Hsp40) homolog, subfamily A, member 1, pseudogene	665839
	1	1.14589	1.10095	1.14509	1.00491	1.18733	1.16979	1.16101	1.62273	1.13764	GM8013		predicted gene 8013	666266
	1	1.18335	1.22716	0.896404	0.809021	1.04143	1.32765	1.5126	1.35451	1.17904	GM8142		predicted gene 8142	666515
	1	1.16519	0.955993	0.665206	0.784811	0.950987	1.58688	1.55277	1.36298	0.949118	GM8951		predicted gene 8951	668055
	1	0.768778	1.05657	0.735277	0.905898	0.970273	0.779301	0.753365	0.565111	0.987713	GM8995		predicted gene 8995; GTPase, very large interferon inducible 1	668139
	1	1.09193	1.20543	0.912654	0.879056	1.18993	1.5228	1.50055	1.35737	1.04384	GM9465		predicted gene 9465	669675
	1	1.09632	0.927719	1.10249	1.15223	1.02434	1.12452	1.00001	0.649083	0.992881	GM9769		predicted gene 9769; prostaglandin E synthase 3 (cytosolic)	100043508		intracellular signaling cascade,
	1	1.11714	0.916614	0.752874	0.683062	1.04765	1.36445	1.57909	1.41914	1.0544	GM9791		predicted gene 9791; calcium regulated heat stable protein 1	52502
	1	0.85013	0.987422	1.00004	0.974374	0.83999	0.719672	0.735541	0.666129	0.905001	GMIP		Gem-interacting protein	78816		intracellular signaling cascade,
	1	1.19325	0.785506	0.936833	0.953051	1.21328	1.91026	1.79015	1.54484	1.03116	GMNN		geminin	57441
	1	0.937076	0.925294	1.01871	1.12537	0.96053	0.902076	0.886175	0.617645	0.888876	GNA13		guanine nucleotide binding protein, alpha 13	14674		intracellular signaling cascade,cell activation,cell activation,
	1	0.851797	0.860105	0.868806	0.686382	0.791362	0.696216	0.809198	0.533495	0.922187	GNAS		GNAS (guanine nucleotide binding protein, alpha stimulating) complex locus	14683		intracellular signaling cascade,
	1	1.01934	1.05798	0.930877	0.994061	0.817774	0.913795	0.99776	0.515386	0.833711	GNB2		guanine nucleotide binding protein (G protein), beta 2	14693			Chemokine signaling pathway,
	1	1.12697	1.19539	1.26996	1.08728	1.34575	1.19108	1.0931	1.76601	1.10321	GNPDA2		glucosamine-6-phosphate deaminase 2	67980
	1	0.830484	0.916382	0.93331	0.886608	0.8786	1.1052	0.915997	0.657677	0.859452	GOLGA7		golgi autoantigen, golgin subfamily a, 7	57437
	1	0.951053	1.08212	1.13609	1.08864	1.34652	1.03164	1.18119	1.50354	1.12793	GP49A		glycoprotein 49 A; leukocyte immunoglobulin-like receptor, subfamily B, member 4	14727	MF,MC	immune response,
	1	0.975585	0.925437	0.839101	0.963968	0.885781	0.710804	0.826852	0.595862	0.952344	GPATCH1		G patch domain containing 1	67471
	1	1.18531	1.22234	0.638668	0.843666	0.933414	1.05489	1.28984	1.02944	1.06251	GPCPD1		preimplantation protein 4	74182
	1	0.89936	1.03432	1.04692	1.02481	0.812511	0.793018	0.682511	0.54147	0.835077	GRAMD1A		GRAM domain containing 1A	52857
	1	0.80622	0.961795	0.973803	0.982729	0.835425	0.760746	0.661473	0.781343	0.85743	GRAMD3		GRAM domain containing 3	107022
	1	0.979485	1.12627	1.04263	1.00802	0.924592	0.928808	0.878811	0.576111	0.906027	GRAP		GRB2-related adaptor protein	71520	B,Sp
	1	1.13241	1.27378	0.964025	1.31484	0.972692	0.725701	0.907837	0.542074	0.910263	GRN		granulin	14824
	1	1.15019	0.650984	1.09908	1.02836	1.17926	1.76357	1.57915	1.72798	1.00793	GSTM5		glutathione S-transferase, mu 5	14866
	1	1.13374	1.06039	1.17331	1.15235	1.30876	1.35293	1.31808	1.53882	1.06897	GYK		glycerol kinase	14933
	1	0.916117	1.0602	1.18062	1.05543	0.958468	0.905321	0.864036	0.646887	0.944702	H13		histocompatibility 13	14950
	1	0.921091	1.13821	0.958724	1.03017	0.895827	0.791689	0.866283	0.600288	0.949917	H2-AB1		histocompatibility 2, class II antigen A, beta 1	14961	B,DC,LN,Sp	immune response,antigen processing and presentation,	Antigen processing and presentation,Cell adhesion molecules (CAMs),
	1	0.931276	1.11556	0.936737	1.04918	0.975553	0.923296	0.996022	0.630234	0.932849	H2-DMB1		histocompatibility 2, class II, locus Mb1	14999	B,DC	immune response,antigen processing and presentation,	Antigen processing and presentation,Cell adhesion molecules (CAMs),
	1	0.741432	0.942376	0.918128	1.02319	0.838501	0.726941	0.83781	0.584361	0.91955	H2-Q7		histocompatibility 2, Q region locus 7	15018		immune response,defense response,antigen processing and presentation,	Antigen processing and presentation,Endocytosis,Cell adhesion molecules (CAMs),
	1	1.09278	1.1075	1.05577	1.05802	0.874515	0.885114	0.811079	0.597377	0.9062	HADH		hydroxyacyl-Coenzyme A dehydrogenase	15107
	1	1.13311	0.970398	0.675192	0.736232	0.991339	1.43413	1.59204	1.34522	1.01691	HAGH		hydroxyacyl glutathione hydrolase	14651
	1	1.02561	1.00151	0.399432	0.432507	0.842934	1.11654	1.68738	0.940572	1.33401	HBA-A1		hemoglobin alpha, adult chain 1	15122	Lu,Sp	hemopoiesis,
	1	1.02343	0.94435	0.401473	0.411414	0.832281	1.11663	1.62785	0.945294	1.35005	HBA-A2		hemoglobin alpha, adult chain 2	15122
	1	0.851685	0.949007	0.416846	0.367312	0.997448	1.19555	1.38919	0.873431	1.31952	HBB-B1		hemoglobin, beta adult major chain	15129		hemopoiesis,
	1	1.15783	1.18809	0.740097	0.767554	1.13082	1.31367	1.55174	1.47181	1.22973	HBB-BH1		hemoglobin Z, beta-like embryonic chain	15132
	1	0.999331	1.02751	1.04602	0.971714	0.918644	0.842049	0.867635	0.569434	0.862012	HDAC7		histone deacetylase 7	56233		transcription,cell activation,defense response,hemopoiesis,cell activation,inflammatory response,
	1	0.970901	1.05407	0.794749	1.11	0.942632	0.671345	0.803986	0.617094	0.963273	HDAC9		histone deacetylase 9	79221		transcription,cell activation,defense response,hemopoiesis,cell activation,inflammatory response,
	1	0.993865	0.896793	1.0297	1.00895	0.881331	0.984737	0.939419	0.616739	0.790174	HDGFRP2		hepatoma-derived growth factor, related protein 2	15193
	1	1.03745	1.27149	1.0332	1.08032	0.97514	0.934004	1.00893	0.661981	1.00398	HEXA		hexosaminidase A	15211
	1	1.01593	1.05367	0.943467	0.982441	0.801034	0.973903	0.882272	0.558303	0.85628	HEXIM1		hexamethylene bis-acetamide inducible 1	192231		transcription,
	1	0.926384	0.98254	0.941472	1.00362	0.888954	0.710527	0.767452	0.525332	0.886335	HIP1R		huntingtin interacting protein 1 related	29816
	1	1.15252	1.25465	0.78737	0.734341	1.33087	1.24145	1.73393	1.74677	1.18517	HIST1H2AB		histone cluster 1, H2ab	319172
	1	1.0732	0.857395	0.828021	0.841513	1.15563	1.58161	1.68717	1.96996	1.0943	HIST1H2AH		histone cluster 1, H2ah	319168		chromatin assembly,
	1	1.03348	0.958385	0.890942	0.863581	0.997753	1.25765	1.30397	1.6701	0.953885	HIST1H2BA		histone cluster 1, H2ba	319177		chromatin assembly,
	1	0.911624	0.835571	0.858087	0.792926	0.888135	1.26294	1.19179	1.82223	1.06668	HIST1H2BB		histone cluster 1, H2bb	319178		chromatin assembly,
	1	1.17572	1.22731	0.932681	0.930669	1.08249	1.11954	1.12468	1.5058	1.28924	HIST1H2BC		histone cluster 1, H2bc	68024		chromatin assembly,
	1	1.06221	1.11332	1.25715	1.07771	1.43052	1.17473	1.14656	1.68729	1.14113	HIST1H2BE		histone cluster 1, H2be	319179
	1	0.960278	0.861189	0.793338	0.772798	0.903044	1.27645	1.4791	2.24386	1.05752	HIST1H2BH		histone cluster 1, H2bh	319182		chromatin assembly,
	1	1.22391	1.09349	0.841041	0.961945	1.13239	1.43373	1.43235	1.92861	1.08913	HIST1H2BP		histone cluster 1, H2bp	319188		chromatin assembly,
	1	1.03598	1.04419	0.911919	0.900618	1.04162	1.26688	1.23478	1.90931	1.15785	HIST1H4I		histone cluster 1, H4i	319158		chromatin assembly,
	1	1.07905	0.861453	0.823675	0.730731	1.03384	1.70746	1.70927	1.31349	0.976576	HIST2H2AA2		histone cluster 2, H2aa2	319192		chromatin assembly,
	1	1.01314	1.05303	0.95975	1.15816	1.14578	1.35644	1.30051	1.61072	1.08731	HIST2H2BE		histone cluster 2, H2be	319190		chromatin assembly,
	1	1.30439	1.19941	0.763382	0.926615	1.22965	1.88069	1.75777	2.08846	1.03599	HIST3H2BA		histone cluster 3, H2ba	78303		chromatin assembly,
	1	1.50097	0.921505	0.910572	0.999761	1.04809	0.844072	0.845317	1.49523	0.872736	HLF		hepatic leukemia factor	217082		transcription,
	1	0.844994	0.881353	1.00854	1.05521	1.05125	0.773587	0.888534	0.644913	1.01791	HMGCS1		3-hydroxy-3-methylglutaryl-Coenzyme A synthase 1	208715
	1	1.10745	0.809731	1.12404	1.21381	1.28526	1.40679	1.29644	1.54267	1.07277	HMGN5		high-mobility group nucleosome binding domain 5; nucleosome binding protein 1	50887		transcription,
	1	0.916804	1.13764	0.945599	1.02833	0.855367	0.806006	0.787313	0.423013	0.867334	HMHA1		histocompatibility (minor) HA-1	70719	B,T,LN,Sp	intracellular signaling cascade,
	1	1.03237	1.03656	1.10723	1.00922	1.54159	1.48867	1.30975	1.53784	1.17378	HNRNPA1		heterogeneous nuclear ribonucleoprotein A1	15382
	1	1.18996	1.05337	1.20628	1.08935	1.36973	1.59156	1.45101	1.30357	1.058	HNRNPA3		heterogeneous nuclear ribonucleoprotein A3	229279
	1	1.20872	1.10469	1.06453	1.00306	1.16159	1.25282	1.24652	0.525328	0.952085	HNRNPL		heterogeneous nuclear ribonucleoprotein L	15388
	1	0.776731	0.825834	0.935108	1.0173	0.748489	0.730092	0.663139	0.782972	0.931647	HOOK1		hook homolog 1 (Drosophila)	77963
	1	1.13087	0.783069	1.04107	1.05467	1.20149	1.63853	1.531	1.46255	1.07228	HORMAD1		HORMA domain containing 1	67981
	1	1.27979	1.36118	0.748476	0.716807	1.193	1.26434	1.63572	1.67039	1.22059	HOXA7		homeo box A7	15404		transcription,
	1	0.836118	0.633467	0.872772	1.09761	0.761411	1.03761	0.930604	0.654642	1.05483	HSP90AA1		heat shock protein 90, alpha (cytosolic), class A member 1	15519			Antigen processing and presentation,NOD-like receptor signaling pathway,
	1	1.07101	0.981061	0.860842	1.16856	0.815001	0.790671	0.839217	0.537338	0.870337	HSP90AB1		heat shock protein 90 alpha (cytosolic), class B member 1	15516			Antigen processing and presentation,NOD-like receptor signaling pathway,
	1	0.778548	0.881187	0.790315	1.18415	0.751443	0.631841	0.659101	0.582384	0.997058	HSP90B1		heat shock protein 90, beta (Grp94), member 1	22027			NOD-like receptor signaling pathway,
	1	0.790006	0.853908	0.793225	1.07671	0.767918	0.72797	0.717488	0.634034	0.895578	HSPA5		heat shock protein 5	14828			Antigen processing and presentation,
	1	0.731096	0.587555	0.69058	1.22381	0.536656	0.69985	0.605918	0.412405	0.719954	HSPA8		heat shock protein 8	15481			Antigen processing and presentation,Endocytosis,MAPK signaling pathway,
	1	0.632325	0.561501	0.795255	1.22409	0.580795	0.79238	0.611017	0.52779	0.822706	HSPH1		heat shock 105kDa/110kDa protein 1	15505
	1	0.923148	1.10093	0.951542	1.1133	0.884897	0.866106	0.927231	0.555461	0.92448	HVCN1		hydrogen voltage-gated channel 1	74096	B
	1	1.11877	1.0908	1.12522	1.29498	0.919637	1.04391	1.09739	0.639223	0.953305	HYOU1		hypoxia up-regulated 1	12282
	1	0.878196	1.02621	0.918051	0.899397	0.965525	0.809104	0.834141	0.594127	0.994915	ID3		inhibitor of DNA binding 3	15903		regulation of apoptosis,
	1	0.995477	1.10686	1.12462	1.08237	1.01541	0.939345	0.917743	0.578658	1.00847	IER2		immediate early response 2	15936
	1	0.929574	1.19925	1.16164	1.00781	1.09594	0.992133	0.948716	0.608124	1.08084	IER5		immediate early response 5	15939
	1	1.08231	1.21337	1.0991	1.06997	0.910089	0.771142	0.852001	0.624322	0.86232	IGFBP4		insulin-like growth factor binding protein 4	16010		defense response,inflammatory response,
	1	1.02363	1.19955	1.10545	1.16449	1.18221	1.08701	1.13417	1.60542	1.04313	IGHA		immunoglobulin heavy constant alpha	238447
	1	0.975322	1.01159	0.935158	0.90769	0.97199	0.871217	1.0585	1.5578	1.35897	IGHG		immunoglobulin heavy chain (gamma polypeptide); immunoglobulin heavy chain 3 (serum IgG2b)	380794	LN,Sp	immune response,defense response,inflammatory response,acute inflammatory response,	B cell receptor signaling pathway,
	1	1.11857	1.18078	0.923399	1.06686	0.732962	0.63276	0.631045	0.502054	0.764586	IGHM		immunoglobulin heavy constant mu	16019
	1	1.03637	1.18067	0.945862	1.26707	1.27297	1.26039	1.53583	1.61215	1.834	IGH-VJ558		immunoglobulin heavy chain (J558 family)	16061		immune response,	B cell receptor signaling pathway,
	1	0.870592	1.0038	0.93377	1.08737	0.913317	0.71913	0.791121	0.590524	0.977928	IKBKB		inhibitor of kappaB kinase beta	16150		intracellular signaling cascade,	Chemokine signaling pathway,B cell receptor signaling pathway,Apoptosis,Toll-like receptor signaling pathway,NOD-like receptor signaling pathway,MAPK signaling pathway,
	1	0.724608	0.884319	0.865495	1.0101	0.907439	0.675917	0.727704	0.560903	0.934751	IKZF3		IKAROS family zinc finger 3	22780	B	transcription,
	1	1.01217	0.900548	1.28898	0.969655	1.86281	1.38051	1.58169	2.38858	1.40547	IL1F9		interleukin 1 family, member 9	215257		immune response,
	1	1.17142	1.30701	1.18301	1.04698	1.16508	1.14138	1.10842	1.54889	1.16525	IMMP2L		IMP2 inner mitochondrial membrane peptidase-like (S. cerevisiae)	93757
	1	1.24402	1.2894	1.23843	1.11136	1.23255	1.06653	1.22071	1.50096	1.01714	INCA1		inhibitor of CDK, cyclin A1 interacting protein 1	103844
	1	0.999045	1.00775	0.877222	0.911247	0.980527	0.725002	0.770406	0.651422	0.901982	INO80D		INO80 complex subunit D	227195
	1	0.861417	1.01818	0.871182	1.06224	0.992716	0.803171	0.805682	0.579269	0.908403	IQGAP1		IQ motif containing GTPase activating protein 1	29875		intracellular signaling cascade,
	1	1.07685	1.14324	1.05236	1.09733	0.969191	0.905674	0.964294	0.653062	0.883535	IRAK1		interleukin-1 receptor-associated kinase 1	16179		immune response,defense response,response to bacterium,	Apoptosis,Toll-like receptor signaling pathway,
	1	0.964175	1.08838	1.07468	0.964641	0.949617	0.880371	0.849304	0.610326	0.93662	IRF5		interferon regulatory factor 5	27056		transcription,	Toll-like receptor signaling pathway,
	1	1.00167	0.956361	0.503404	0.612019	0.898887	1.40985	1.6432	0.704012	0.621636	ISG15		ISG15 ubiquitin-like modifier	677168
	1	1.25454	1.16506	1.33944	1.1863	1.41497	1.40361	1.34549	1.93697	1.2254	ITGB3BP		integrin beta 3 binding protein (beta3-endonexin)	67733		transcription,
	1	0.987137	1.05165	0.836227	1.0409	0.938146	0.773222	0.816354	0.625459	1.12904	JUN		Jun oncogene	16476		transcription,	B cell receptor signaling pathway,Toll-like receptor signaling pathway,MAPK signaling pathway,
	1	1.08071	1.26683	1.20051	1.05614	1.13419	1.06966	1.03398	0.489729	1.05863	JUNB		Jun-B oncogene	16477		transcription,
	1	1.21787	1.21059	1.19993	0.878682	1.03212	1.12068	1.08721	0.564913	1.05	JUND		Jun proto-oncogene related gene d	16478		transcription,	MAPK signaling pathway,
	1	1.22692	1.03171	0.999476	0.993815	1.17858	1.20028	1.27779	1.70411	1.16384	KBTBD12		kelch domain containing 6	74589
	1	0.638639	0.880243	0.884817	0.923648	0.867579	0.901576	0.810235	0.927363	0.903249	KCNE3		potassium voltage-gated channel, Isk-related subfamily, gene 3	57442
	1	1.16195	1.06579	0.982362	0.951369	1.15863	1.25699	1.17876	1.70079	1.06028	KCTD9		potassium channel tetramerisation domain containing 9	105440
	1	1.04862	1.04321	1.02343	1.02821	0.970606	0.881856	0.981125	0.534773	0.856922	KEAP1		kelch-like ECH-associated protein 1	50868		transcription,
	1	1.08446	0.84782	0.927344	0.973397	1.11717	1.51751	1.37488	1.52868	0.963603	KIF18A		kinesin family member 18A	228421
	1	1.07242	1.13525	0.988746	1.12517	0.920619	0.72365	0.800454	0.638399	0.870888	KIF1C		kinesin family member 1C	16562
	1	0.94329	1.10799	1.02035	1.15593	1.02639	0.824024	0.888959	0.660029	0.975251	KLF6		Kruppel-like factor 6	23849		transcription,
	1	0.813939	0.952417	0.936966	0.946247	0.830854	0.785919	0.748418	0.6644	0.842108	KLHL6		kelch-like 6 (Drosophila)	239743	T	immune response,
	1	1.04584	1.284	0.998506	1.18852	0.977908	0.824028	0.904191	0.660757	1.07574	LAPTM5		lysosomal-associated protein transmembrane 5	16792
	1	0.872355	0.877109	0.681328	0.762778	0.839237	1.13601	1.27205	0.49954	0.926049	LBR		lamin B receptor	98386
	1	1.05504	1.02224	1.10746	1.23727	1.26381	1.31128	1.24199	1.57433	1.06325	LCORL		ligand dependent nuclear receptor corepressor-like	209707		transcription,
	1	0.955793	1.17153	1.12995	1.24399	1.2738	0.947824	0.96509	0.566622	1.05788	LCP1		lymphocyte cytosolic protein 1	18826		immune response,cell activation,cell activation,
	1	1.08705	1.13802	1.13795	0.983752	1.10929	1.34893	1.27284	1.58276	1.06325	LETM2		leucine zipper-EF-hand containing transmembrane protein 2	270035
	1	1.06498	0.738699	0.755027	0.699799	1.3069	1.51754	1.53397	1.10828	1.04924	LMNB1		lamin B1	16906
	1	0.968678	0.917166	0.915756	1.08601	0.880262	0.756116	0.774001	0.634121	0.923714	LMNB2		lamin B2	16907
	1	0.914916	1.02233	1.01177	0.889798	0.933292	0.839019	0.88297	0.603255	0.913474	LRMP		lymphoid-restricted membrane protein	16970	B,T
	1	1.06271	1.1342	1.02139	1.05415	0.972402	0.797096	0.934585	0.572709	0.920519	LRP10		low-density lipoprotein receptor-related protein 10	65107
	1	0.932925	0.681089	0.861596	0.917821	1.10778	1.59618	1.5194	1.53927	0.967118	LRR1		leucine rich repeat protein 1	69706
	1	1.14678	1.18109	1.2203	1.09625	1.18545	1.01097	1.04971	1.56378	1.09363	LRRIQ3		leucine-rich repeats and IQ motif containing 3	74435
	1	1.21637	0.864092	1.22592	1.08497	1.25477	1.65394	1.49117	1.15321	0.998741	LSM2		LSM2 homolog, U6 small nuclear RNA associated (S. cerevisiae)	27756
	1	0.861136	1.03397	0.955601	1.0804	0.836178	0.700185	0.784177	0.657217	0.809077	LSP1		lymphocyte specific 1	16985		defense response,chemotaxis,
	1	1.03987	1.18038	1.20534	0.95448	1.25794	1.02442	1.02955	1.59915	1.20039	LST1		leukocyte specific transcript 1	16988		intracellular signaling cascade,immune response,regulation of apoptosis,cell activation,cell activation,
	1	0.848586	1.032	0.569069	0.944898	1.05352	0.811867	1.11851	0.559123	1.22154	LUC7L2		predicted gene 11889; LUC7-like 2 (S. cerevisiae)	192196
	1	0.780489	1.02605	0.680099	0.705172	0.693908	0.67818	0.892793	1.7095	1.10242	LY6G		lymphocyte antigen 6 complex, locus G	546644
	1	0.949178	1.14108	0.940204	1.15545	0.946616	0.806951	0.816439	0.611131	0.949415	LYN		Yamaguchi sarcoma viral (v-yes-1) oncogene homolog	17096		intracellular signaling cascade,hemopoiesis,	Chemokine signaling pathway,B cell receptor signaling pathway,
	1	1.15515	1.23237	1.19889	1.05656	1.0608	1.08196	1.06275	0.549849	1.06733	LYPLA2		lysophospholipase 2	26394
	1	0.912235	0.889181	0.857412	0.986607	0.701213	0.650915	0.753353	0.690523	0.947589	M6PR		mannose-6-phosphate receptor, cation dependent	17113
	1	1.03148	0.813087	0.893352	0.937974	1.10566	1.60073	1.58149	1.34816	0.987915	MAD2L1		MAD2 mitotic arrest deficient-like 1 (yeast)	56150
	1	0.826623	1.07788	1.08268	1.16233	0.923945	0.840686	0.827428	0.529829	0.990129	MADD		MAP-kinase activating death domain	228355		intracellular signaling cascade,regulation of apoptosis,
	1	1.17012	1.277	1.25238	1.11411	1.0289	0.787971	0.882663	0.552413	1.08934	MAFB		v-maf musculoaponeurotic fibrosarcoma oncogene family, protein B (avian)	16658		transcription,
	1	1.0596	1.11416	1.15552	1.06313	1.25597	1.15586	1.15412	1.52216	1.06192	MAGOHB		mago-nashi homolog B (Drosophila)	66441
	1	0.94344	1.0773	0.941589	1.09703	0.742659	0.664253	0.791059	0.541171	0.764799	MAN2B1		mannosidase 2, alpha B1	17159
	1	1.06351	1.14922	1.0784	1.13488	1.0746	0.855208	0.943618	0.664286	0.937411	MAN2C1		mannosidase, alpha, class 2C, member 1	73744
	1	0.919665	1.08311	1.14572	1.03911	0.977276	0.847487	0.851748	0.654578	0.906286	MAP3K3		mitogen-activated protein kinase kinase kinase 3	26406		intracellular signaling cascade,	MAPK signaling pathway,
	1	0.864101	1.04657	1.02268	1.04508	0.938023	0.784867	0.788268	0.610998	0.85813	MAP4K2		mitogen-activated protein kinase kinase kinase kinase 2	26412		intracellular signaling cascade,	MAPK signaling pathway,
	1	1.03195	1.06741	1.04031	1.04007	1.07201	1.02144	0.957363	0.66099	1.02019	MAPK8IP3		mitogen-activated protein kinase 8 interacting protein 3	30957		intracellular signaling cascade,	MAPK signaling pathway,
	1	1.07796	1.05839	0.677538	0.690238	0.992339	1.38175	1.6224	1.0706	1.13502	MARCH3		membrane-associated ring finger (C3HC4) 3	320253
	1	1.19637	1.01275	0.911	0.87718	1.16369	1.53886	1.59433	1.56469	1.03085	MARCH5		predicted gene 7684; membrane-associated ring finger (C3HC4) 5	69104
	1	1.04376	1.13627	1.15933	1.06283	1.03223	0.963478	0.98949	0.651477	0.91539	MARK2		MAP/microtubule affinity-regulating kinase 2	13728		intracellular signaling cascade,
	1	1.01272	1.01741	0.994763	0.985297	0.977783	0.931255	0.999658	0.632195	0.96186	MBD3		methyl-CpG binding domain protein 3	17192		transcription,
	1	0.941392	1.09962	0.82882	1.16113	0.982302	0.73462	0.842885	0.598988	0.902597	MBNL2		muscleblind-like 2	105559
	1	1.10138	1.08441	1.07639	1.05014	1.11301	1.17361	1.13075	1.54437	0.87981	MED12		mediator of RNA polymerase II transcription, subunit 12 homolog (yeast)	59024		transcription,
	1	0.989631	0.973537	1.09891	1.08743	1.07923	1.29683	1.08367	1.59339	1.00998	MED21		mediator complex subunit 21	108098		transcription,
	1	1.1806	0.982992	0.820137	0.792181	1.02246	1.6355	1.40423	0.943936	0.992052	METTL7A2		methyltransferase like 7A2	393082
	1	0.86572	0.958175	0.96056	1.00691	0.858712	0.698892	0.767245	0.563849	0.969338	MICALL1		microtubule associated monoxygenase, calponin and LIM domain containing -like 1	27008
	1	1.07567	0.81011	0.969634	0.922287	1.214	1.4305	1.5217	1.37411	0.972379	MIER3		mesoderm induction early response 1, family member 3	218613		transcription,
	1	0.924344	1.03917	0.996955	1.00153	1.00893	0.915434	0.939581	0.627006	1.04418	MIF4GD		MIF4G domain containing	69674
	1	1.02449	1.01388	1.02183	0.952261	1.03368	0.988799	1.05406	0.612826	0.978929	MKNK2		MAP kinase-interacting serine/threonine kinase 2	17347		intracellular signaling cascade,	MAPK signaling pathway,
	1	1.41787	1.58683	0.721113	0.753135	1.32621	1.06794	2.17126	1.46905	1.31291	MKRN1		makorin, ring finger protein, 1	54484
	1	0.925811	1.01879	0.902129	0.992204	0.935405	0.82867	0.87175	0.627909	0.982946	MLL3		myeloid/lymphoid or mixed-lineage leukemia 3	231051		transcription,intracellular signaling cascade,
	1	0.927851	1.03471	0.94049	1.13723	1.04723	0.945751	0.92433	1.55482	1.17712	MMP3		matrix metallopeptidase 3	17392	MF
	1	1.26453	0.809328	1.05387	1.13756	1.25103	1.54416	1.5235	1.62776	1.284	MMS22L		MMS22-like, DNA repair protein	212377
	1	1.14641	0.710213	1.07875	0.932513	1.25032	1.44858	1.42898	1.80759	0.963286	MND1		meiotic nuclear divisions 1 homolog (S. cerevisiae)	76915
	1	0.824332	0.874994	0.800928	1.03611	0.75843	0.667856	0.716457	0.563112	0.904359	MOB1A		MOB kinase activator 1A	232157
	1	0.981684	0.849926	0.93747	1.07936	0.788028	0.741057	0.855197	0.600458	0.861934	MOGS		mannosyl-oligosaccharide glucosidase	57377
	1	0.903713	1.01011	1.00538	1.03489	0.997482	0.805046	0.863046	0.615961	0.905379	MOV10		Moloney leukemia virus 10	17454
	1	1.35159	1.16735	0.85051	0.957871	1.18821	1.6252	1.81766	1.31621	1.03155	MPP2		membrane protein, palmitoylated 2 (MAGUK p55 subfamily member 2)	50997
	1	0.942004	0.932304	0.907856	0.952236	0.753897	0.756443	0.757135	0.611996	0.869894	MPRIP		myosin phosphatase Rho interacting protein	26936
	1	1.13109	0.942571	1.14497	1.01631	1.21298	1.34968	1.27971	1.53757	1.03469	MRPL35		mitochondrial ribosomal protein L35	66223
	1	0.959488	1.36694	1.2034	1.15815	1.17996	1.06887	1.32834	1.61882	1.17605	MS4A7		membrane-spanning 4-domains, subfamily A, member 7	109225	MF
	1	0.784543	0.955556	0.861657	0.884335	0.830777	0.680987	0.834881	0.528569	0.878158	MSI2		Musashi homolog 2 (Drosophila)	76626
	1	1.0812	1.0367	1.06145	0.967769	1.22426	1.09838	1.25964	1.58293	1.05251	MTF1		metal response element binding transcription factor 1	17764		transcription,
	1	1.1654	1.06524	1.19705	1.18392	1.27656	1.14627	1.02953	1.60454	1.19697	MTRF1		mitochondrial translational release factor 1	211253
	1	0.996907	1.09121	1.07911	0.956602	0.892676	0.876891	0.797584	0.562143	1.03237	MUS81		MUS81 endonuclease homolog (yeast)	71711
	1	1.0335	1.11512	0.991301	1.10506	1.03195	0.718661	0.868235	0.61885	0.874099	MVP		major vault protein	78388
	1	1.12191	0.951567	0.860676	1.02333	0.874474	0.733097	0.838639	0.531542	0.888388	MYBBP1A		MYB binding protein (P160) 1a	18432		transcription,
	1	1.34702	1.21294	1.08771	0.977298	1.13908	1.49371	1.30884	1.67682	1.15888	MYLK3		myosin light chain kinase 3	213435
	1	1.04048	0.882194	0.867452	0.888949	1.15439	1.66309	1.50529	1.54661	0.941863	MYLPF		myosin light chain, phosphorylatable, fast skeletal muscle	17907			Leukocyte transendothelial migration,
	1	0.911726	1.05604	0.940361	1.00873	0.874453	0.723423	0.754579	0.6036	0.877027	MYO1G		myosin IG	246177	DC
	1	1.00328	1.08624	0.795583	1.18117	1.04125	0.935223	0.895051	0.602763	0.889863	MYST3		MYST histone acetyltransferase (monocytic leukemia) 3	244349		transcription,hemopoiesis,chromatin assembly,
	1	1.13559	0.954358	1.06127	1.10692	1.23877	1.40203	1.34259	1.52805	1.11144	NAA38		LSM8 homolog, U6 small nuclear RNA associated (S. cerevisiae)	76522
	1	1.26052	1.06995	1.28836	1.27955	1.38947	1.43109	1.36893	1.61406	1.01292	NAF1		nuclear assembly factor 1 homolog (S. cerevisiae)	234344
	1	1.14304	0.983943	1.25077	1.12596	1.2524	1.21665	1.23117	1.50424	0.898112	NAP1L1		nucleosome assembly protein 1-like 1	53605		chromatin assembly,
	1	0.987331	0.679113	0.825928	0.876988	1.03413	1.59299	1.65079	1.61099	1.0391	NCAPG2		non-SMC condensin II complex, subunit G2	76044
	1	1.21515	1.21795	0.927198	0.90491	1.32605	1.41751	1.77678	1.77423	1.14465	NCOA7		nuclear receptor coactivator 7	211329		transcription,
	1	1.12931	0.943926	1.17221	1.09334	1.08631	1.2772	1.11677	1.62311	1.1402	NDUFB3		NADH dehydrogenase (ubiquinone) 1 beta subcomplex 3	66495
	1	1.12198	0.886548	0.691169	0.816795	1.12147	1.82005	2.08476	1.62558	0.983368	NEIL3		nei like 3 (E. coli)	234258
	1	1.0959	0.990458	1.02422	0.992343	1.17656	1.29681	1.39854	1.5252	1.04049	NET1		neuroepithelial cell transforming gene 1	56349		intracellular signaling cascade,
	1	0.892363	1.12275	0.852868	1.14372	0.939855	0.732116	0.676246	0.564921	0.945029	NFATC1		nuclear factor of activated T-cells, cytoplasmic, calcineurin-dependent 1	18018		transcription,intracellular signaling cascade,	B cell receptor signaling pathway,
	1	1.04877	1.03785	1.06374	1.13859	0.982983	0.810487	0.8611	0.660258	0.966626	NFIB		nuclear factor I/B	18028		transcription,
	1	0.869931	0.999881	0.917771	1.00485	0.859534	0.663344	0.777189	0.611616	0.829939	NFKB1		nuclear factor of kappa light polypeptide gene enhancer in B-cells 1, p105	18033		transcription,	Chemokine signaling pathway,B cell receptor signaling pathway,Apoptosis,Toll-like receptor signaling pathway,NOD-like receptor signaling pathway,MAPK signaling pathway,
	1	0.981694	1.13076	1.1101	1.04074	1.03582	0.921002	0.924143	0.529239	0.919485	NFKB2		nuclear factor of kappa light polypeptide gene enhancer in B-cells 2, p49/p100	18034		transcription,immune response,cell activation,cell activation,	MAPK signaling pathway,
	1	0.911076	0.977688	1.1911	1.09586	1.00267	0.943791	0.875676	0.600817	0.841282	NFKBID		nuclear factor of kappa light polypeptide gene enhancer in B-cells inhibitor, delta	243910	B,MF,MC	regulation of apoptosis,defense response,inflammatory response,
	1	0.898399	1.06652	0.963196	1.00151	0.946278	0.826287	0.812835	0.650363	0.884925	NFRKB		nuclear factor related to kappa B binding protein	235134
	1	0.998688	1.13083	0.983479	1.00849	0.959041	0.690754	0.736722	0.49697	0.738499	NID1		nidogen 1	18073
	1	0.958992	1.06625	1.00342	1.01282	0.780492	0.693535	0.750615	0.463866	0.827204	NISCH		nischarin	64652		intracellular signaling cascade,
	1	0.995424	1.01848	1.28583	1.02541	1.74716	1.10925	1.19317	1.65019	1.30359	NLRP12		NLR family, pyrin domain containing 12	378425		regulation of apoptosis,
	1	0.854245	0.954437	1.04261	1.0083	0.921729	0.900745	0.82365	0.648932	0.942933	NR2C2AP		nuclear receptor 2C2-associated protein	75692
	1	1.05571	1.11637	1.17914	1.10257	1.27843	1.11003	0.972269	1.72805	1.231	NR2E3		nuclear receptor subfamily 2, group E, member 3	23958		transcription,
	1	1.24899	1.12493	1.16851	1.4038	1.26081	1.28698	1.40688	1.90244	1.05458	NRIP1		nuclear receptor interacting protein 1	268903		transcription,
	1	1.18234	1.0784	0.632736	0.734943	1.03883	1.62249	1.75066	1.58971	1.06054	NT5C3		5'-nucleotidase, cytosolic III	107569
	1	0.957578	0.911838	0.816723	0.972071	0.874107	0.862183	0.973912	0.594204	0.940488	NUCB1		nucleobindin 1	18220
	1	1.04898	0.719573	0.704857	0.773431	0.920544	1.61132	1.65758	1.49328	1.02993	NUF2		NUF2, NDC80 kinetochore complex component, homolog (S. cerevisiae)	66977	N
	1	0.903391	1.13426	0.998863	0.957341	1.04618	0.777871	0.907927	0.62896	0.922185	NUP62-IL4I1		Nup62-Il4i1 protein	100328588
	1	1.03707	0.912834	1.09947	1.09787	1.17264	1.32666	1.25251	1.50882	1.11284	ODF2L		outer dense fiber of sperm tails 2-like	52184
	1	1.58312	1.30281	1.5065	1.36186	1.34807	1.32339	1.18695	1.91818	1.52595	ODZ4		odd Oz/ten-m homolog 4 (Drosophila)	23966
	1	1.0572	0.72656	0.776596	0.849279	1.00069	1.70043	1.67637	1.61584	1.02367	OIP5		Opa interacting protein 5	70645
	1	1.24575	1.34215	0.742959	0.757035	1.34229	1.24498	1.75262	1.67401	1.19872	OLFR97		olfactory receptor 97	258505
	1	1.01437	1.06059	1.16163	1.10815	1.25795	1.25028	1.20346	1.67993	0.963625	ORC4		origin recognition complex, subunit 4	26428
	1	1.1329	0.785271	0.979064	1.03752	1.14744	1.59577	1.50898	1.57438	0.994609	ORC6		origin recognition complex, subunit 6	56452
	1	1.16499	1.15938	1.1022	1.02439	1.06657	1.04061	1.07732	0.643235	0.956612	ORF61		open reading frame 61	216157
	1	0.821744	0.757579	0.759073	0.806101	0.603135	0.609479	0.605089	0.567655	0.725479	P4HB		prolyl 4-hydroxylase, beta polypeptide	18453
	1	0.92868	0.887316	1.09472	1.01108	0.826429	0.870627	0.794398	0.569766	0.833136	PANK4		pantothenate kinase 4	269614
	1	0.933339	0.991252	0.914902	0.97492	0.903953	0.806098	0.828026	0.627579	0.800752	PARP10		similar to Plec1 protein	671535
	1	1.00022	0.958097	1.02445	1.05906	0.988546	0.943762	1.05734	0.593553	0.970714	PCBP1		poly(rC) binding protein 1	23983
	1	0.838655	1.04414	1.07121	1.06648	0.945	0.966593	0.876264	0.648653	1.02271	PCDH12		protocadherin 12	53601
	1	1.01026	0.839233	1.12465	1.04003	1.09552	1.44973	1.11272	1.67829	1.02079	PCNP		PEST proteolytic signal containing nuclear protein	76302
	1	1.04461	1.06127	1.08995	1.13453	1.00283	0.877914	0.912561	0.641371	1.0175	PCNXL3		similar to pecanex-like 3; pecanex-like 3 (Drosophila)	104401
	1	1.22574	1.05068	0.869855	0.930333	0.975812	1.31878	1.50922	1.13027	1.02638	PCX		pyruvate carboxylase	18563
	1	0.899244	0.994897	0.892852	1.20339	0.940113	0.745022	0.71507	0.637738	1.01357	PDE7A		phosphodiesterase 7A	18583
	1	1.15358	1.07042	1.20624	1.13286	1.25048	1.33791	1.28908	1.77586	1.17771	PFDN4		prefoldin 4	109054
	1	1.14253	0.998783	1.14119	1.08364	1.15803	1.19327	1.23279	1.61729	1.08605	PGRMC2		progesterone receptor membrane component 2	70804
	1	1.0489	1.11613	1.09448	1.02711	1.12628	0.96903	0.925981	0.664968	0.998381	PHC2		polyhomeotic-like 2 (Drosophila)	54383
	1	0.954487	1.09584	1.09518	0.912788	0.962232	0.922448	0.89351	0.637996	1.02916	PHF1		PHD finger protein 1	21652		transcription,
	1	0.904286	0.909566	0.965259	0.981435	0.886538	0.88899	0.8189	0.644899	0.884412	PHF23		PHD finger protein 23	78246
	1	1.11301	0.954959	0.881009	0.841706	1.12972	1.78278	1.73182	1.76054	1.14172	PI4K2B		phosphatidylinositol 4-kinase type 2 beta	67073
	1	0.945716	0.916144	0.958344	1.17381	0.869163	0.848198	0.868928	0.636671	0.948751	PI4KB		phosphatidylinositol 4-kinase, catalytic, beta polypeptide	107650		intracellular signaling cascade,
	1	0.942701	0.99186	0.875366	0.960288	0.855823	0.830617	0.875156	0.662904	0.947395	PIAS1		protein inhibitor of activated STAT 1	56469		transcription,intracellular signaling cascade,
	1	1.20696	1.18354	0.87634	0.836515	1.22019	1.50512	1.72285	1.36665	1.11397	PIGQ		phosphatidylinositol glycan anchor biosynthesis, class Q	14755
	1	0.798459	0.840764	0.873196	1.00946	0.838252	0.839547	0.761456	0.657394	0.874924	PIGT		phosphatidylinositol glycan anchor biosynthesis, class T	78928
	1	0.844004	0.936031	0.907418	0.982849	0.878018	0.814519	0.816644	0.65578	0.983887	PIK3AP1		phosphoinositide-3-kinase adaptor protein 1	83490	DC,MF		B cell receptor signaling pathway,
	1	1.16162	1.23335	1.05278	0.995211	1.30195	1.25515	1.50591	0.729556	0.934027	PIM1		proviral integration site 1	18712		regulation of apoptosis,
	1	1.01237	1.01488	0.949495	0.951176	0.846323	0.890328	0.850663	0.61899	0.990326	PIM3		proviral integration site 3	223775
	1	1.23022	0.990554	0.657602	0.866804	1.07777	1.62176	1.69257	1.81797	1.04901	PIR		pirin	69656
	1	1.08151	1.11893	1.02745	1.01821	0.969343	0.871598	0.900405	0.616869	0.854995	PITPNM1		phosphatidylinositol transfer protein, membrane-associated 1	18739
	1	1.04355	0.659513	0.996388	0.877516	1.11106	1.30571	1.31205	1.29012	1.10182	PLA2G12A		phospholipase A2, group XIIA	66350
	1	1.09637	1.05511	0.757378	0.80674	1.05914	1.42543	1.50909	1.28434	1.09034	PLA2G16		phospholipase A2, group XVI	225845
	1	0.795239	1.11724	0.871171	0.919294	0.830126	0.627194	0.704741	0.719298	1.08707	PLA2G2D		phospholipase A2, group IID	18782
	1	0.897065	0.549912	0.861377	0.973584	0.995604	1.30556	1.29235	1.10038	0.949213	PLA2G4C		phospholipase A2, group IVC (cytosolic, calcium-independent)	232889
	1	1.04099	0.856689	1.13025	1.11473	1.24108	1.25037	1.3238	1.69123	1.02809	PLAC1L		placenta-specific 1-like	225922
	1	0.964348	1.10154	1.04396	1.05304	0.920522	0.801486	0.814476	0.584108	0.84314	PLEKHG2		pleckstrin homology domain containing, family G (with RhoGef domain) member 2	101497
	1	1.02823	1.13924	1.1026	1.08839	1.02824	0.919935	0.915138	0.517813	0.921979	PLEKHO1		pleckstrin homology domain containing, family O member 1	67220
	1	1.0647	1.09324	0.919427	1.17647	0.93003	0.870358	0.891498	0.64205	0.847183	PLOD1		procollagen-lysine, 2-oxoglutarate 5-dioxygenase 1	18822
	1	1.27901	1.45466	1.21833	1.33244	1.16609	0.969893	1.02465	0.630859	0.862396	PLVAP		plasmalemma vesicle associated protein	84094
	1	1.00614	1.14097	0.990394	1.00272	0.841275	0.689995	0.854832	0.610388	0.881635	PLXNB2		plexin B2	140570
	1	1.02331	0.687702	0.923555	0.878781	1.2277	1.48179	1.57219	2.03736	1.01054	POLE		polymerase (DNA directed), epsilon	18973
	1	1.01323	0.746668	0.963141	1.01249	1.15188	1.54277	1.40115	1.31085	0.958881	POLE2		polymerase (DNA directed), epsilon 2 (p59 subunit)	18974
	1	0.833034	0.949509	0.950324	0.88119	0.858214	0.741858	0.777452	0.650037	0.931866	POMGNT1		protein O-linked mannose beta1,2-N-acetylglucosaminyltransferase	68273
	1	1.08409	1.12978	1.14214	1.00772	1.04828	1.01052	0.982571	0.615084	0.99493	POU2F2		POU domain, class 2, transcription factor 2	18987
	1	0.897214	0.867482	0.903559	1.17054	0.852999	0.696792	0.720669	0.646077	0.846631	PPIP5K2		histidine acid phosphatase domain containing 1	227399
	1	1.03633	0.867767	1.12414	1.06336	1.2469	1.32821	1.21375	1.64292	1.08277	PPM1L		protein phosphatase 1 (formerly 2C)-like	242083
	1	1.36526	1.27844	0.565877	0.629124	0.968999	1.60678	1.8191	0.915072	1.01507	PPP1R15A	Myd116	protein phosphatase 1, regulatory (inhibitor) subunit 15A; myeloid differentiation primary response gene 116	17872
	1	0.697115	0.895723	0.986521	1.00927	0.894725	0.752583	0.744731	0.581632	0.950283	PPP1R16B		protein phosphatase 1, regulatory (inhibitor) subunit 16B	228852
	1	1.11867	1.0026	1.11276	1.13615	1.31967	1.23857	1.2558	1.52499	1.00694	PPP1R2-PS5		protein phosphatase 1, regulatory (inhibitor) subunit 2, pseudogene 5	100040488
	1	0.919736	1.06944	0.893712	0.979788	1.01137	0.864621	1.01404	1.9652	1.06405	PPP1R42		protein phosphatase 1, regulatory subunit 42	69312
	1	0.923227	0.910306	0.922095	0.999837	0.888056	0.887791	0.935549	0.54191	0.9589	PPP4C		protein phosphatase 4, catalytic subunit	56420
	1	0.820514	0.930606	0.929218	1.06776	0.804955	0.741698	0.60258	0.729562	0.904695	PRDM15		PR domain containing 15	114604
	1	0.669614	2.46303	0.567962	0.430792	0.335828	0.289495	0.550089	0.942984	1.16841	PRG2		proteoglycan 2, bone marrow	19074
	1	0.714083	1.3086	0.739355	0.607111	0.596969	0.456133	0.615002	0.844171	0.961641	PRG3		proteoglycan 3	53856
	1	0.783996	1.05426	1.0588	1.03129	0.873554	0.767845	0.841597	0.593201	0.884014	PRKCB		protein kinase C, beta	18751
	1	0.863195	0.96346	0.893808	0.986302	0.836542	0.724308	0.782497	0.594144	0.803745	PRKCD		protein kinase C, delta	18753
	1	0.947281	1.07203	0.95405	1.13696	0.936957	0.737723	0.62783	0.967858	0.859484	PRMT2		protein arginine N-methyltransferase 2	15468
	1	1.21663	1.34782	0.722135	0.599164	1.23948	1.43004	1.82082	1.53561	1.12486	PROK2		prokineticin 2	50501
	1	1.06642	1.16943	0.895227	1.52337	1.13986	0.936984	1.02549	0.79632	1.31974	PRPF39		PRP39 pre-mRNA processing factor 39 homolog (yeast)	328110
	1	0.937198	0.943795	0.991384	1.01233	0.836476	0.865855	0.954472	0.644978	0.781475	PRPF8		pre-mRNA processing factor 8	192159
	1	1.09029	1.03286	1.13789	1.08047	1.06199	1.1137	1.09207	0.583098	0.872794	PRRC2A		proline-rich coiled-coil 2A	53761
	1	0.994761	1.03847	1.09772	1.03124	0.88164	0.822034	0.78258	0.659679	0.816976	PRRC2B		proline-rich coiled-coil 2B	227723
	1	1.06868	0.63103	0.963021	0.986866	1.11999	1.5041	1.38907	1.30067	1.05895	PSMC3IP		proteasome (prosome, macropain) 26S subunit, ATPase 3, interacting protein	19183
	1	1.05187	0.901498	1.26653	1.15339	1.27209	1.30815	1.23331	1.60137	1.01564	PSPC1		paraspeckle protein 1	66645
	1	1.11368	0.903756	0.920229	0.913354	1.08361	1.38812	1.52403	1.26365	1.11692	PSRC1		proline/serine-rich coiled-coil 1	56742
	1	0.996443	1.05049	0.988942	1.10127	1.00126	0.895189	0.897825	0.666347	0.966089	PTK2B		PTK2 protein tyrosine kinase 2 beta	19229
	1	1.20909	1.32496	1.29905	1.15221	1.3887	1.20029	1.16628	2.0164	1.23838	PTPLAD2		protein tyrosine phosphatase-like A domain containing 2	66775
	1	0.800393	0.947571	0.92736	0.942309	0.824124	0.738408	0.742151	0.633745	0.898207	PTPN6	SHP-1	protein tyrosine phosphatase, non-receptor type 6	15170
	1	0.845514	1.04695	1.01264	0.869657	0.874615	0.891836	0.777884	0.620931	0.899884	PTPRCAP		protein tyrosine phosphatase, receptor type, C polypeptide-associated protein	19265
	1	0.99296	1.07498	1.03905	0.93549	0.953722	0.840193	0.83109	0.558914	0.975724	PTPRS		protein tyrosine phosphatase, receptor type, S	19280
	1	1.09951	1.04913	0.693416	0.733596	1.07458	1.73258	1.7858	1.66291	1.06208	PTTG1		pituitary tumor-transforming gene 1	30939
	1	1.02575	0.969746	1.09549	0.952941	0.944213	0.933076	0.915635	0.593539	0.977477	PURB		purine rich element binding protein B	19291
	1	1.1565	1.07573	1.28023	1.24171	1.2544	1.10872	1.10309	1.53639	1.10007	QK		quaking	19317
	1	0.942583	0.990986	0.911624	1.03262	0.920034	0.860659	0.861874	0.555009	1.00808	QRICH1		glutamine-rich 1	69232
	1	1.01712	1.03017	1.05376	1.07057	1.06356	0.954931	0.942125	0.634288	0.947243	RAB1B		RAB1B, member RAS oncogene family	76308
	1	1.16371	0.974305	0.707215	0.7808	0.997699	1.42614	1.5542	1.00942	0.983133	RAB3IL1		RAB3A interacting protein (rabin3)-like 1	74760
	1	0.863084	1.06582	0.899104	1.04264	0.772185	0.714077	0.710435	0.60107	0.880791	RASA3		RAS p21 protein activator 3	19414
	1	1.02044	0.997986	0.862103	0.878921	1.01662	1.33896	1.54132	1.11046	0.881996	RB1		retinoblastoma 1	19645
	1	0.955855	1.04097	0.932011	1.1765	0.927802	0.864368	0.801024	0.644366	0.936282	RBBP6		retinoblastoma binding protein 6	19647
	1	0.846628	0.85802	0.855192	0.976269	0.767403	0.855193	0.784167	0.613074	0.86712	RBM10		RNA binding motif protein 10	236732
	1	0.852594	0.771616	0.918718	0.913648	0.853333	1.00217	1.00477	0.635674	0.857377	RBMXL1		RNA binding motif protein, X linked-like-1	19656
	1	0.368372	0.319455	0.480687	0.286229	0.325669	0.298997	0.308115	0.325517	0.331383	REG3A		regenerating islet-derived 3 alpha	19694
	1	0.163184	0.10722	0.392756	0.103795	0.093895	0.157784	0.109654	0.112039	0.273275	REG3B		regenerating islet-derived 3 beta	18489
	1	0.952736	1.04987	1.00102	1.03231	0.90629	0.786136	0.837137	0.652985	0.932829	RELB		avian reticuloendotheliosis viral (v-rel) oncogene related B	19698
	1	0.942822	1.68765	1.09726	0.960131	1.42169	0.909512	1.24394	2.19619	1.2622	RETNLG		resistin like gamma	245195
	1	0.962661	1.06683	1.14208	0.960344	0.976459	0.872798	0.873791	0.621371	0.914082	RGL2		ral guanine nucleotide dissociation stimulator-like 2	19732
	1	0.979899	1.15102	1.02528	1.3814	0.882159	0.682072	0.731396	0.614865	0.871818	RIN3		Ras and Rab interactor 3	217835
	1	1.03198	1.0851	1.10592	1.17377	1.22839	0.869336	0.95567	0.551199	0.940963	RNF44		ring finger protein 44	105239
	1	0.71892	0.755928	0.713336	0.720548	0.819032	0.802094	0.781835	3.00153	0.839441	RNU11		U11 small nuclear RNA	353373
	1	0.972462	0.958145	0.797002	1.08081	0.835663	0.739592	0.889563	0.646834	1.00299	ROCK1		Rho-associated coiled-coil containing protein kinase 1	19877
	1	0.999982	0.875832	0.96801	1.00095	1.14487	1.51289	1.33271	1.51293	1.09793	RPA3		replication protein A3	68240
	1	0.838281	0.935309	0.981886	1.03348	0.988617	0.823126	0.867174	0.644566	0.996838	RPGRIP1		retinitis pigmentosa GTPase regulator interacting protein 1	77945
	1	1.01146	0.874432	1.06566	0.990249	1.0523	1.20613	1.13212	1.5441	1.06128	RPL41		ribosomal protein L41	67945
	1	1.16998	0.994585	1.20821	1.17081	1.26863	1.49307	1.33747	1.51495	1.07615	RPP30		ribonuclease P/MRP 30 subunit (human)	54364
	1	1.16043	1.12912	0.980418	0.92263	1.28657	0.899954	1.16048	1.94786	1.00758	RPRD2		regulation of nuclear pre-mRNA domain containing 2	75137
	1	1.0399	1.2101	1.07161	0.992086	0.915391	0.832379	0.880281	0.61915	0.934949	RPS6KA1		ribosomal protein S6 kinase polypeptide 1	20111
	1	1.20951	1.28922	1.11759	1.16625	1.38632	1.05154	1.10048	1.60539	1.16899	RSPH3B		radial spokehead-like 2B	66832
	1	0.956272	0.924801	0.98472	1.14405	0.919434	0.917877	0.899638	0.657871	1.04335	RUNDC1		RUN domain containing 1	217201
	1	1.01982	1.02517	1.07732	1.04492	1.0159	0.865346	0.857531	0.636267	0.897758	RXRB		retinoid X receptor beta	20182
	1	1.20626	1.21999	1.35256	1.27597	1.51813	1.19074	1.1938	1.61945	1.08538	S100A11		S100 calcium binding protein A11 (calgizzarin)	20195
	1	0.816828	1.10751	1.01089	1.22632	0.88019	0.684592	0.692301	0.593261	0.906065	S1PR1		sphingosine-1-phosphate receptor 1	13609
	1	0.903415	1.05678	0.93205	1.08402	0.867054	0.632366	0.72587	0.679655	0.90595	S1PR3		sphingosine-1-phosphate receptor 3	13610
	1	0.761671	0.811606	0.699259	1.20116	0.714088	0.535785	0.601799	0.507478	0.867782	SAMD9L		sterile alpha motif domain containing 9-like	209086
	1	1.03768	1.11719	1.12158	1.05647	1.02698	0.884106	0.937684	0.558655	0.827289	SBF1		SET binding factor 1	77980
	1	1.02388	1.12329	1.07181	1.09048	1.14722	0.898465	0.929488	0.61188	0.907468	SBNO2		strawberry notch homolog 2 (Drosophila)	216161
	1	1.18344	1.28955	0.827929	0.747392	1.16199	1.19991	1.58913	1.38797	1.03158	SCGB3A2		secretoglobin, family 3A, member 2	117158
	1	1.05573	0.848602	0.974085	1.08268	1.17353	1.81654	1.54747	1.56452	1.06124	SCOC		short coiled-coil protein	56367
	1	1.12246	1.14737	1.09016	0.979574	1.32916	0.842107	1.0814	1.69869	1.0789	SCRG1		scrapie responsive gene 1	20284
	1	0.982693	1.08976	1.043	1.02183	0.986509	0.888931	0.917079	0.619232	0.87574	SCRIB		scribbled homolog (Drosophila)	105782
	1	1.06637	1.01829	1.02279	0.99322	0.958738	0.914838	0.840185	0.647787	0.954991	SCYL1		SCY1-like 1 (S. cerevisiae)	78891
	1	1.05331	1.08905	0.95421	1.06818	1.0974	1.20034	1.22814	1.52775	1.22126	SDCBP		syndecan binding protein	53378
	1	1.19108	1.22449	0.861171	0.79751	1.10866	1.3462	1.51922	1.54362	1.23203	SEC61G		SEC61, gamma subunit	20335
	1	0.872948	0.927388	0.874671	0.939341	0.731271	0.594464	0.617977	0.689433	0.788647	SEL1L		sel-1 suppressor of lin-12-like (C. elegans)	20338
	1	0.980689	1.21509	1.11565	1.24466	1.12206	0.900117	0.999855	0.651411	0.973642	SEMA4D		sema domain, immunoglobulin domain (Ig), transmembrane domain (TM) and short cytoplasmic domain, (semaphorin) 4D	20354
	1	0.88527	0.946713	1.0096	1.10399	1.04534	0.958697	0.869683	0.509866	0.926573	SGMS1		sphingomyelin synthase 1	208449
	1	1.00995	0.801945	0.670842	0.745429	0.984697	1.57479	1.57751	1.11252	0.994545	SGOL1		shugoshin-like 1 (S. pombe)	72415
	1	1.15806	0.834588	0.741716	0.853913	1.07568	1.6459	1.67103	1.45153	1.05701	SGOL2		shugoshin-like 2 (S. pombe)	68549
	1	0.947216	1.07354	1.0508	1.0382	0.936241	0.866342	0.818509	0.61835	0.848504	SH2B1		SH2B adaptor protein 1	20399
	1	0.889894	1.02848	1.02945	1.04447	0.956058	0.792372	0.833349	0.576219	0.812407	SH3BP5		SH3-domain binding protein 5 (BTK-associated)	24056
	1	1.03423	0.71135	0.880743	0.87879	0.95428	1.65312	1.51111	1.54491	0.884399	SHCBP1		Shc SH2-domain binding protein 1	20419
	1	0.895463	1.09575	0.978198	1.10549	0.869106	0.787769	0.767635	0.635534	0.891371	SHISA5		shisa homolog 5 (Xenopus laevis)	66940
	1	0.767152	0.93435	0.926475	0.989595	1.01215	0.93268	0.820857	0.614859	0.821395	SIGLECG		sialic acid binding Ig-like lectin G	243958
	1	0.989872	1.05389	1.04597	1.15081	0.931343	0.880082	0.87681	0.561335	1.03692	SIN3B		transcriptional regulator, SIN3B (yeast)	20467
	1	0.818518	0.933572	0.902551	0.859971	0.848511	0.775584	0.779511	0.524003	0.894646	SIPA1		signal-induced proliferation associated gene 1	20469
	1	1.09313	1.11144	1.25306	1.1954	1.51642	1.16003	1.14718	1.45302	1.01286	SIRPB1B		signal-regulatory protein beta 1B	668101
	1	0.932067	1.13803	0.987371	1.17503	0.965835	0.777815	0.779671	0.594288	0.950334	SIRT7		sirtuin 7 (silent mating type information regulation 2, homolog) 7 (S. cerevisiae)	209011
	1	0.741647	1.07693	0.870759	1.12934	0.847426	0.734096	0.697898	0.58097	0.999327	SKAP1		src family associated phosphoprotein 1	78473
	1	0.78174	0.929789	0.642356	0.958195	0.785754	0.604807	0.7143	0.363371	0.992996	SKIL		SKI-like	20482
	1	1.10367	0.850375	0.969319	0.980748	1.15561	1.53823	1.51316	1.44628	1.0998	SLC25A21		solute carrier family 25 (mitochondrial oxodicarboxylate carrier), member 21	217593
	1	1.4154	1.42614	0.78851	0.748972	1.0676	1.29388	1.8218	1.05407	1.12817	SLC25A39		solute carrier family 25, member 39	68066
	1	0.860057	0.884047	0.877453	1.04398	0.78815	0.655562	0.656356	0.640112	0.919832	SLC28A2		solute carrier family 28 (sodium-coupled nucleoside transporter), member 2	269346
	1	1.04877	1.07793	1.23458	1.15773	1.0634	1.11182	1.0312	1.513	1.11715	SLC35A5		solute carrier family 35, member A5	74102
	1	0.995837	1.06852	1.03783	0.968532	0.960557	0.922304	0.929201	0.643598	0.865134	SLC38A10		solute carrier family 38, member 10	72055
	1	0.879206	1.04939	1.05205	0.982937	0.955879	0.910214	0.822479	0.599976	1.05061	SLC7A6OS		solute carrier family 7, member 6 opposite strand	66432
	1	0.821007	0.915958	1.01517	0.968027	0.895755	0.818182	0.690557	0.644226	0.919	SLC9A7		solute carrier family 9 (sodium/hydrogen exchanger), member 7	236727
	1	1.19247	1.04485	0.611588	0.726045	0.917586	1.46193	1.52312	1.28199	1.03942	SLFN14-PS		schlafen family member 14, pseudogene	237890
	1	0.930575	1.08958	1.03417	1.0854	0.862761	0.768595	0.819265	0.525429	0.896033	SMAD4		MAD homolog 4 (Drosophila)	17128
	1	1.21554	1.14723	0.881195	0.847967	1.21131	1.26063	1.44409	1.63771	0.981473	SMOX		spermine oxidase	228608
	1	1.25345	1.0537	0.524966	0.669083	0.927079	1.37077	1.72301	1.56087	1.02593	SNCA		synuclein, alpha	20617
	1	0.915627	0.854231	0.790132	0.943022	0.682995	0.745541	0.745729	0.665239	0.924364	SNIP1		Smad nuclear interacting protein 1	76793
	1	1.1234	0.900307	1.10298	1.1645	1.31592	1.42286	1.33813	1.68518	1.0106	SNRPD1		small nuclear ribonucleoprotein D1	20641
	1	0.797755	1.1532	1.05414	1.02586	0.960941	0.778071	0.796196	0.366864	0.978399	SNX18		sorting nexin 18	170625
	1	0.941144	1.09918	1.08771	0.946949	0.914513	0.861897	0.81529	0.591218	0.935908	SNX20		sorting nexin 20	71607
	1	0.984369	1.13105	1.1065	1.05779	1.04179	0.923384	0.922343	0.571305	0.966989	SNX30		sorting nexin family member 30	209131
	1	1.0539	1.19092	1.24613	1.13183	1.20245	1.02254	1.17573	1.608	1.2365	SNX31		sorting nexin 31	66696
	1	0.923464	1.09288	0.978457	1.20679	0.924314	0.86867	0.900935	0.657722	1.04927	SOAT1		sterol O-acyltransferase 1	20652
	1	1.07599	1.00952	1.06442	1.04511	0.869471	0.769663	0.82631	0.66522	1.01917	SOCS5		suppressor of cytokine signaling 5	56468
	1	0.856627	0.942476	0.843063	0.869713	0.937931	0.776519	0.756869	0.645376	0.958334	SON		Son DNA binding protein	20658
	1	1.26757	1.28094	0.894439	0.833996	1.35897	1.36462	1.70392	1.70935	1.21384	SOX10		SRY-box containing gene 10	20665
	1	1.19054	0.85574	1.13182	0.996169	1.31998	1.49972	1.50128	1.63918	1.02882	SPATA24		RIKEN cDNA 5133400G04 gene	71242
	1	1.01682	0.777314	0.678449	0.808935	1.03226	1.93041	1.79619	1.47752	0.986282	SPC25		SPC25, NDC80 kinetochore complex component, homolog (S. cerevisiae)	66442
	1	1.14751	1.01988	0.554641	0.697363	0.945508	1.57181	1.97458	1.11917	1.08169	SPECC1		sperm antigen with calponin homology and coiled-coil domains 1	432572
	1	0.885472	0.980149	0.860681	0.960849	0.800664	0.66227	0.687204	0.660034	0.823954	SPNA2		spectrin alpha 2	20740
	1	1.13518	1.14267	0.910624	1.23198	1.0096	0.86405	0.975903	0.656798	0.875772	SPOP		speckle-type POZ protein	20747
	1	1.1427	1.09956	1.0926	1.07265	1.02808	0.897496	1.04698	0.618671	0.988884	SREBF1		sterol regulatory element binding transcription factor 1	20787
	1	1.20893	1.18279	0.792461	1.11585	0.987089	0.847551	0.956817	0.565696	0.919779	SRRM2		serine/arginine repetitive matrix 2	75956
	1	0.969737	0.981128	0.921766	0.998759	0.918719	0.936698	0.997312	0.6499	0.866042	SRRT		serrate RNA effector molecule homolog (Arabidopsis)	83701
	1	0.916033	0.925388	0.989522	1.00448	0.902232	0.880762	0.838172	0.599747	0.842494	ST3GAL1		ST3 beta-galactoside alpha-2,3-sialyltransferase 1	20442
	1	1.08075	0.97535	0.962284	0.982335	1.09509	1.05024	1.42855	1.61052	1.02533	ST3GAL2		ST3 beta-galactoside alpha-2,3-sialyltransferase 2	20444
	1	0.95941	1.018	0.997894	1.10544	0.937352	0.799254	0.887635	0.643607	0.951866	STAT6		signal transducer and activator of transcription 6	20852
	1	0.861853	0.825383	1.0347	1.15252	1.72197	1.13625	1.21915	1.28641	1.06399	STEAP4		STEAP family member 4	117167
	1	1.12466	1.14472	1.48765	1.15338	2.73425	1.3464	1.55632	2.81337	1.47089	STFA2L1		stefin A2 like 1	268885
	1	0.798179	0.87087	0.817329	0.793952	1.23826	0.706038	0.588207	1.87262	1.08571	STFA3		cDNA sequence BC100530; stefin A3	20863
	1	1.03409	0.789594	0.769565	0.782188	1.00066	1.64494	1.69799	1.38864	0.921714	STIL		Scl/Tal1 interrupting locus	20460
	1	1.09176	1.07135	1.04935	1.15238	0.977828	0.906141	0.961144	0.647825	0.964835	STIM1		stromal interaction molecule 1	20866
	1	1.06167	1.13003	1.07777	1.14732	1.04356	1.06601	0.973206	0.618568	1.00358	STK25		serine/threonine kinase 25 (yeast)	59041
	1	0.835127	0.850442	0.855656	0.85758	0.83114	0.775983	0.867802	0.576573	0.82332	SUN1		unc-84 homolog A (C. elegans)	77053
	1	0.974	0.678439	0.872691	0.9053	0.95356	1.62576	1.49134	1.56157	1.05962	SVIP		small VCP/p97-interacting protein	75744
	1	1.08686	0.774549	0.926975	0.894164	1.18875	1.52178	1.59234	1.47661	1.06073	SYCE2		synaptonemal complex central element protein 2	71846
	1	1.04473	1.02011	1.28437	1.32831	2.1229	1.29737	1.41323	1.62338	1.43614	SYCP2		synaptonemal complex protein 2	320558
	1	1.23132	1.26675	0.827121	0.806354	1.20209	1.24316	1.56016	1.53651	1.17162	SYT2		synaptotagmin II	20980
	1	1.34704	1.39701	1.0152	1.0846	1.4271	1.28883	1.53136	1.62249	1.16737	SYTL2		synaptotagmin-like 2	83671
	1	0.966017	1.04561	1.01596	0.961362	0.936178	0.92863	0.897409	0.577856	0.813169	SYVN1		synovial apoptosis inhibitor 1, synoviolin	74126
	1	0.875118	1.00236	1.00589	0.925974	0.921769	0.864852	0.82599	0.614136	0.989089	TADA3		transcriptional adaptor 3 (NGG1 homolog, yeast)-like	101206
	1	1.09698	1.21024	1.14327	1.19832	1.12654	0.923309	0.971991	0.580809	0.93278	TAP2		transporter 2, ATP-binding cassette, sub-family B (MDR/TAP)	21355
	1	1.17277	1.08371	1.16328	1.10618	1.16111	1.2436	1.13368	1.50939	1.05537	TATDN3		TatD DNase domain containing 3	68972
	1	1.08734	1.00715	1.10945	1.17411	1.17043	1.28362	1.18855	1.58297	1.07125	TBR1		T-box brain gene 1	21375
	1	0.905229	0.873727	0.74268	1.01362	0.849745	0.753746	0.851774	0.660857	0.855744	TCF12		transcription factor 12	21406
	1	1.05186	1.02226	0.981603	0.925751	0.870973	0.871347	0.928726	0.609534	0.877836	TCF25		transcription factor 25 (basic helix-loop-helix)	66855
	1	1.05682	0.988383	1.00603	0.967242	0.970528	0.895974	0.960811	0.535534	0.854179	TCF3		transcription factor E2a	21423
	1	0.851764	1.09323	1.06064	1.06741	0.741362	0.743717	0.70959	0.626799	0.932537	TCRA		T-cell receptor alpha chain	21473
	1	1.11352	0.772427	1.08316	0.926768	1.27265	1.25842	1.34093	1.74467	1.09987	TCTE3		t-complex-associated testis expressed 3	21647
	1	1.23913	1.184	1.24845	1.19949	1.2137	1.0787	1.00981	1.66951	1.30684	TDRKH		tudor and KH domain containing protein	72634
	1	0.916074	0.963947	0.985339	0.960563	0.803626	0.720307	0.658074	0.815099	0.899183	TES		testis derived transcript	21753
	1	1.22621	0.999716	0.55933	0.684157	0.80909	1.42092	1.48377	1.07369	0.992255	TFDP2		transcription factor Dp 2	211586
	1	1.10337	1.17812	1.22297	1.15953	1.0543	1.03001	1.01333	0.661581	0.880278	TGFB1		transforming growth factor, beta 1	21803
	1	0.850303	1.19707	1.03238	1.57709	0.931298	0.746066	0.680947	0.917526	1.01843	THEMIS		thymocyte selection pathway associated	210757
	1	0.986959	0.977856	1.10925	1.13637	1.06193	1.11839	1.0332	0.580767	1.00717	TIAL1		Tia1 cytotoxic granule-associated RNA binding protein-like 1	21843
	1	1.18919	0.771574	0.957247	0.969689	1.17988	1.70562	1.6938	1.81986	1.01509	TIPIN		timeless interacting protein	66131
	1	0.921758	0.85183	0.821604	0.860032	0.926978	0.901841	0.920274	0.599558	0.892953	TM9SF1		transmembrane 9 superfamily member 1	74140
	1	0.993056	1.16181	0.983963	0.979837	0.950958	0.835906	0.927092	0.661047	0.939444	TMBIM6		transmembrane BAX inhibitor motif containing 6	110213
	1	1.06713	1.04703	1.17098	1.07694	1.16003	1.01175	1.00577	1.6593	0.962603	TMCC1		transmembrane and coiled coil domains 1	330401
	1	1.02218	1.03526	1.11299	0.972479	1.29239	1.21755	1.26419	1.57114	1.05763	TMEM128		transmembrane protein 128	66309
	1	1.14782	1.09365	1.05069	1.00662	1.19201	1.37379	1.32211	1.54415	1.08596	TMEM60		transmembrane protein 60	212090
	1	0.74698	1.09947	1.01724	0.926033	0.90548	0.725079	0.868859	0.459612	0.90709	TNF		tumor necrosis factor	21926
	1	0.893278	0.941975	1.03933	1.00051	0.972189	0.86643	0.836134	0.656032	0.920793	TNFAIP1		tumor necrosis factor, alpha-induced protein 1 (endothelial)	21927
	1	1.07291	0.908735	0.687866	0.747377	0.939589	1.44445	1.59619	1.58526	0.951312	TNK1		tyrosine kinase, non-receptor, 1	83813
	1	1.1891	1.0267	1.0816	1.0571	1.1032	1.00365	1.11978	0.577292	0.912886	TNK2		tyrosine kinase, non-receptor, 2	51789
	1	0.931027	1.0411	1.08235	1.0705	0.907927	0.863348	0.816357	0.578609	0.925381	TNRC6C		trinucleotide repeat containing 6C	217351
	1	0.915168	0.933197	1.06651	0.96682	0.879402	0.959167	0.82539	0.528552	0.83242	TOB1		transducer of ErbB-2.1	22057
	1	1.17162	0.904182	0.783413	0.876581	1.08533	1.55439	1.48245	1.5378	0.965723	TOM1L1		target of myb1-like 1 (chicken)	71943
	1	0.792171	0.926727	0.901467	0.960249	0.779269	0.671538	0.647525	0.740029	0.929506	TPM4		tropomyosin 4; predicted gene 7809	326618
	1	0.934049	0.941217	0.969836	0.996792	1.07276	0.862954	0.897448	0.51656	0.927943	TRA2A		transformer 2 alpha homolog (Drosophila)	101214
	1	1.0004	0.644387	0.732894	0.936303	1.01565	1.41137	1.37101	1.27766	0.963491	TRAIP		TRAF-interacting protein	22036
	1	1.10684	1.02495	0.702549	0.73873	0.935614	1.27015	1.55518	1.11469	1.05571	TRAK2		trafficking protein, kinesin binding 2	70827
	1	0.828041	1.04207	0.868611	0.858149	1.02823	0.877337	1.00576	2.01592	1.09637	TREM3		triggering receptor expressed on myeloid cells 3	58218
	1	0.870712	1.0351	1.03411	1.16975	1.06387	0.8664	0.750897	0.514006	1.0219	TREML2		triggering receptor expressed on myeloid cells-like 2	328833
	1	0.921005	1.16548	0.994774	0.936857	0.939695	0.800029	0.884362	0.623247	0.874134	TREX1		three prime repair exonuclease 1	22040
	1	1.16901	0.664801	1.09363	0.928301	0.989466	1.48421	1.40599	1.05616	0.964155	TRFR2		transferrin receptor 2	50765
	1	0.937854	1.07259	1.17794	1.07261	1.60301	1.111	1.12271	1.49741	0.991771	TRIM30B		Trim30b tripartite motif-containing 30B	244183
	1	1.06622	1.11184	1.11315	1.2152	0.969679	0.976211	0.942933	0.621743	0.985657	TRIM8		tripartite motif protein 8	93679
	1	0.898116	1.08072	1.06051	1.12109	0.996912	0.828477	0.829441	0.594274	0.842842	TRP53I11		transformation related protein 53 inducible protein 11	277414
	1	1.04902	1.00098	0.964907	0.961576	0.888794	0.838294	0.885116	0.648551	0.894236	TSHZ1		teashirt zinc finger family member 1	110796
	1	1.23308	0.992961	0.671937	0.822289	1.08973	2.11386	1.90278	1.27142	1.09768	TSPAN8		tetraspanin 8	216350
	1	1.23264	0.885553	0.670851	0.683604	0.992005	1.6008	1.78055	1.46005	0.942586	TSPO2		benzodiazapine receptor, peripheral-like 1	70026
	1	0.850845	0.936344	0.892199	1.08383	0.909212	0.943952	0.895402	0.643623	1.03717	TTC14		tetratricopeptide repeat domain 14	67120
	1	0.946193	1.05373	0.994624	1.02897	0.973702	0.824514	0.788557	0.665464	0.93544	TTC5		tetratricopeptide repeat domain 5	219022
	1	1.10161	1.08575	1.09941	0.909097	1.14833	1.31903	1.52252	1.30962	0.929101	TTF2		transcription termination factor, RNA polymerase II	74044
	1	0.983664	1.11102	1.03101	1.05539	0.908874	0.849478	0.861047	0.65588	0.904275	TWF2		twinfilin, actin-binding protein, homolog 2 (Drosophila)	23999
	1	1.26312	1.06551	1.12622	1.09389	1.30992	1.37563	1.37867	1.67383	1.2361	TXN1		thioredoxin 1	22166
	1	0.982655	1.08207	0.860311	0.976813	0.852658	0.614933	0.689444	0.67221	0.92882	TXNDC5		thioredoxin domain containing 5	105245
	1	1.0352	1.35861	0.988683	0.896956	1.02561	0.89213	0.912651	0.661067	1.10085	TXNIP		thioredoxin interacting protein	56338
	1	1.17334	1.09398	0.86905	0.842199	1.13543	1.31121	1.54843	1.41489	1.01164	TXNRD2		thioredoxin reductase 2	26462
	1	0.934818	1.10208	1.00638	1.14551	0.928883	0.824963	0.85207	0.658708	0.922556	TYK2		tyrosine kinase 2	54721
	1	0.805317	0.828336	0.828107	0.967832	0.701658	0.582438	0.631474	0.617643	0.822617	UBA5		ubiquitin-like modifier activating enzyme 5	66663
	1	1.0062	1.18531	0.886239	0.821004	0.932815	0.907788	1.06075	0.60821	1.08008	UBC		ubiquitin C	22190
	1	1.02204	1.14551	1.27809	1.13364	1.41011	1.19266	1.38029	1.78648	1.43335	UBD		ubiquitin D	24108
	1	1.34703	1.50531	0.644921	0.828202	1.00109	1.2869	2.04842	0.865764	0.984184	UBE2O		ubiquitin-conjugating enzyme E2O	217342
	1	1.19538	1.28703	0.925523	0.960918	1.09347	1.18139	1.52867	0.947819	1.16607	UBE2R2		ubiquitin-conjugating enzyme E2R 2	67615
	1	0.96035	0.819676	0.661115	0.50346	0.98225	2.07436	2.01983	0.851904	0.937782	UBE2S		ubiquitin-conjugating enzyme E2S	77891
	1	1.09427	0.981948	1.17944	1.18867	1.22846	1.391	1.31388	1.51265	0.993711	UBE2V2		ubiquitin-conjugating enzyme E2 variant 2	70620
	1	0.930686	0.886983	0.914558	1.06084	0.842562	0.877672	0.872123	0.635529	0.893767	UBQLN1		ubiquilin 1	56085
	1	0.909955	0.525488	0.814798	0.997286	1.08071	1.67839	1.49893	1.74483	1.12057	UGT8A		UDP galactosyltransferase 8A	22239
	1	0.940513	1.03113	0.978869	1.05921	0.860448	0.748459	0.823609	0.641677	0.792374	UNC119B		unc-119 homolog B (C. elegans)	106840
	1	1.03567	0.772249	0.758991	0.844635	1.02548	1.45548	1.52943	1.64989	0.937379	UROS		uroporphyrinogen III synthase	22276
	1	1.08598	1.19533	1.02033	1.10297	0.964318	0.899763	0.9338	0.582628	0.946207	USF1		upstream transcription factor 1	22278
	1	1.04437	0.886565	0.89993	0.924257	0.968009	1.11129	1.22932	1.63561	1.04391	USP15		ubiquitin specific peptidase 15	14479
	1	1.00185	0.943032	0.79046	1.13157	0.807618	0.697931	0.764392	0.615945	0.98356	USP34		ubiquitin specific peptidase 34	17847
	1	0.902958	0.896034	0.917913	1.07865	0.890589	0.889738	0.859059	0.638177	0.888517	USP48		ubiquitin specific peptidase 48	170707
	1	1.04247	0.962713	0.992999	0.997514	0.877125	0.88655	0.911527	0.636898	0.971721	USP5		ubiquitin specific peptidase 5 (isopeptidase T)	22225
	1	1.17742	1.03898	1.00424	1.0182	1.0272	0.871569	1.02852	0.663204	0.877022	VARS		valyl-tRNA synthetase	22321
	1	0.882082	1.00246	0.93737	1.06272	0.891799	0.811168	0.83497	0.643119	0.854322	VAV1		vav 1 oncogene	22324
	1	1.30408	1.26702	1.19235	1.24762	1.35716	1.04445	1.06755	1.85295	1.2175	VCAM1		vascular cell adhesion molecule 1	22329
	1	1.08866	1.12709	1.24355	1.1837	0.96927	0.880132	0.832952	0.603232	0.916058	VGLL4		vestigial like 4 (Drosophila)	232334
	1	0.912764	1.00232	0.947738	1.07182	0.759421	0.67178	0.674814	0.607973	0.891493	VIM		vimentin	22352
	1	1.13952	1.22892	0.872493	0.802992	1.15462	1.09361	1.50374	1.50399	1.12204	VMN1R178		vomeronasal 1 receptor, D13	232959
	1	1.39865	1.2953	0.914204	0.923874	1.20968	1.4444	1.59536	1.58258	1.17259	WBSCR27		Williams Beuren syndrome chromosome region 27 (human)	79565
	1	1.02987	1.14409	1.03117	1.09898	0.905024	0.74999	0.822616	0.653548	0.874115	WDFY4		WD repeat and FYVE domain containing 4	545030
	1	1.08857	1.02285	0.912836	0.994065	0.94792	0.916013	1.01482	0.574015	1.02446	WDR81		WD repeat domain 81	192652
	1	0.851037	0.97956	0.968615	1.0271	0.844058	0.649012	0.721717	0.600215	0.868542	XBP1		X-box binding protein 1	22433
	1	1.14428	1.03295	0.571642	0.709101	0.887295	1.60051	1.70431	1.64524	1.01517	XPO7		exportin 7	65246
	1	1.14077	1.05512	0.525091	0.63174	0.833751	1.56359	1.64143	0.688039	1.0022	YPEL4		yippee-like 4 (Drosophila)	241525
	1	1.32581	1.37486	0.929878	0.873914	1.23856	1.36411	1.80076	1.61865	1.30268	YPEL5		yippee-like 5 (Drosophila)	383295
	1	0.949323	0.948321	0.941449	0.948096	0.854966	0.943941	0.876605	0.615721	0.849522	ZC3H11A		zinc finger CCCH type containing 11A	70579
	1	0.879239	1.05111	0.97468	0.979362	0.935217	0.909204	0.945701	0.57453	1.02185	ZC3H12A		zinc finger CCCH type containing 12A	230738
	1	1.10645	1.15308	1.0128	0.944283	0.958561	1.01116	1.11814	0.550933	1.16058	ZFAND5		zinc finger, AN1-type domain 5	22682
	1	0.868748	1.0071	0.807706	1.28976	0.939744	0.830402	0.838037	0.657008	1.08457	ZFML		zinc finger, matrin-like	18139
	1	0.929549	0.986757	0.907673	1.00314	0.935781	0.754317	0.783596	0.647357	0.939064	ZFP148		zinc finger protein 148	22661
	1	0.881004	0.944061	1.00227	0.863655	0.863261	0.87994	0.845084	0.62894	0.966564	ZFP276		zinc finger protein (C2H2 type) 276	57247
	1	0.86608	0.954584	0.889595	1.02604	0.860303	0.729209	0.748688	0.661941	0.893703	ZFP292		zinc finger protein 292	30046
	1	0.754169	0.949096	0.818723	0.992492	0.857221	0.741657	0.704234	0.626528	0.879008	ZFP62		zinc finger protein 62	22720
	1	1.02404	1.09363	1.02791	0.965424	0.90701	0.927488	0.94804	0.607065	0.936777	ZFP740		zinc finger protein 740	68744
	1	0.871834	0.886904	0.923458	1.10644	0.825928	0.854217	0.823346	0.624591	0.834114	ZKSCAN3		zinc finger with KRAB and SCAN domains 3	72739
	1	0.984796	0.985778	1.13897	1.05676	1.03856	1.05309	0.989444	1.52115	0.948902	ZKSCAN6		zinc finger with KRAB and SCAN domains 6	52712
	1	1.16576	1.09981	1.12843	1.00127	1.1634	1.42602	1.3061	1.54207	1.114	ZRANB1		zinc finger, RAN-binding domain containing 1	360216
	1	1.07578	1.03756	1.03719	1.10683	1.20709	1.35923	1.07528	1.50992	1.07649	ZSCAN4C		zinc finger and SCAN domain containing 4C	245109
	1	1.1622	1.05733	1.13606	1.14241	1.27471	1.49465	1.23556	1.66752	0.992281	ZSCAN4D		zinc finger and SCAN domain containing 4D	545913
